# 1 Super-resolution Molecular Map of Basal Foot Reveals Novel Cilium in Airway

## 2 Multiciliated Cells

3

4 Quynh P.H. Nguyen<sup>1,2</sup>, Zhen Liu<sup>1,2</sup>, Rashmi Nanjundappa<sup>3</sup>, Alexandre Megherbi<sup>4</sup>, Nathalie  
5 Delgehr<sup>4</sup>, Hong Ouyang<sup>5</sup>, Lorna Zlock<sup>6</sup>, Etienne Coyaud<sup>7</sup>, Estelle Laurent<sup>7</sup>, Sharon Dell<sup>8</sup>, Walter  
6 Finkbeiner<sup>6</sup>, Theo Moraes<sup>5</sup>, Brian Raught<sup>7</sup>, Kirk Czymmek<sup>9</sup>, Alice Munier<sup>4</sup>, Moe R. Mahjoub<sup>10</sup>  
7 and Vito Mennella<sup>\*1,2</sup>

8

9 1. Biochemistry Department, University of Toronto, Toronto, Canada.

10 2. Cell Biology Program, The Hospital for Sick Children, Toronto, Canada.

11 3. Department of Medicine, Nephrology Division, Washington University, St Louis, MO.

12 4. Cilia biology and neurogenesis, Institut de biologie de l'Ecole normale supérieure (IBENS), CNRS,  
13 INSERM, PSL Université, Paris, France.

14 5. Translational Medicine Program, The Hospital for Sick Children, Toronto, Canada.

15 6. Department of Pathology, University of California San Francisco, San Francisco, CA, USA.

16 7. Princess Margaret Cancer Centre, University Health Network, Toronto, ON, Canada.

17 8. Child Health Evaluative Sciences, Program, The Hospital for Sick Children, Toronto, Canada.

18 9. Carl Zeiss Microscopy, Thornwood, New York, USA.

19 10. Department of Cell Biology and Physiology, Washington University, St Louis, MO.

20 \* Corresponding author. Email: [mennellalaboratory@gmail.com](mailto:mennellalaboratory@gmail.com)

21

22

23 **Keywords:** Super-resolution Imaging, centrosome, basal bodies, appendages, airway, cilia,  
24 ciliopathies, Primary Ciliary Dyskinesia, quantitative imaging, FIB-SEM

25

26

27

28

29

30

31

32

33 **Abstract**

34 Motile cilia are beating machines that play a critical role in airway defense. During airway  
35 cell differentiation, hundreds of motile cilia are templated from basal bodies that extend a basal  
36 foot, an appendage that links motile cilia together to ensure beating coordination. This assembly  
37 has thus far escaped structural analysis because its size is below the resolution limit. Here, we  
38 determine the molecular architecture and identify basal foot proteins using a super-resolution-  
39 driven approach. Quantitative super-resolution image analysis shows that the basal foot is  
40 organized in three main regions linked by elongated coiled-coil proteins. FIB-SEM tomography  
41 and comparative super-resolution mapping of basal feet reveal that, among hundreds of motile  
42 cilia of an airway cell, a hybrid cilium with features of primary and motile cilia is harbored. The  
43 hybrid cilium is conserved in mammalian multiciliated cells and originates from parental  
44 centrioles. We further demonstrate that this novel cilium is a signalling centre whose cellular  
45 position is dependent on flow.

46

47

48

49

50

51

52

53

54

55

56

## 57 **Introduction**

58 Motile cilia are beating machines that generate the propulsive force required for  
59 mucociliary clearance, thereby protecting the airways from recurrent infections and environmental  
60 pollutants<sup>1,2</sup>. To beat in coordination, motile cilia rely on the basal foot, a triangular structure  
61 attached to the basal body on one end and to the microtubule cytoskeleton on the other, thereby  
62 linking hundreds of motile cilia together in a network<sup>3,4,5</sup>. The hundreds of motile cilia on the  
63 surface of an airway multiciliated cell are thought to be similar to each other and templated from  
64 identical basal bodies each presenting at their base one basal foot<sup>6,7</sup> pointing toward the direction  
65 of ciliary beating<sup>8,9</sup>—a phenomenon termed rotational polarity<sup>10,11</sup>.

66 In airway cells, loss of the basal foot results in disruption of the microtubule apical network,  
67 irreversible disorientation of basal bodies and lack of motile cilia coordination<sup>4</sup>. In mice, loss of  
68 the basal foot leads to respiratory manifestations indicative of Primary Ciliary Dyskinesia  
69 (PCD)<sup>4,12</sup>, an autosomal recessive disease characterized by chronic airway infections, and  
70 frequently associated with hearing loss, male infertility, hydrocephalus and heterotaxy, which can  
71 lead to lung collapse and death in mid adulthood<sup>13,14,1,2,15,16</sup>. Despite the basal foot's critical role  
72 in airway physiology and multiciliated cell function, its molecular organization remains to be  
73 elucidated.

74 In cells protruding a primary cilium, the basal foot—along with centrosomal proximal end  
75 proteins—keeps the primary cilium submerged by linking the basal body to the Golgi network  
76 thereby avoiding ectopic Shh-signalling<sup>17,18</sup>. Differently from motile cilia, the basal foot of the  
77 primary cilium is present in multiple copies per basal body and is thought to originate from nine  
78 (or less depending on the cell type) subdistal appendages, mother centriole-associated structures  
79 contributing to interphase microtubule organization<sup>21,20,8</sup> (Fig.1a). In mammalian cells, subdistal  
80 appendages appear in electron microscopy (EM) micrographs as thin, conical-shaped structures

81 with a round tip connected to the centrosomal barrel by two microtubule triplets<sup>22,21,23,24</sup>. Less is  
82 known about the basal foot structure and composition in primary cilia, and no consensus has been  
83 reached on its nomenclature: this assembly has been named differently depending on the study and  
84 cell type (e.g. satellite arms<sup>21</sup>, basal feet<sup>25</sup> or subdistal appendages<sup>17</sup>).

85 Several proteins have been assigned to the basal foot and subdistal appendages in  
86 mammalian cells through conventional fluorescence microscopy and immuno-EM (Ninein  
87 (NIN)<sup>26</sup>, ODF2/Cenexin<sup>4,27,28</sup>, CC2D2A<sup>29</sup>, CEP170<sup>30</sup>, Galactin-3<sup>3</sup>,  $\epsilon$ -Tubulin<sup>31</sup>, Centriolin  
88 (CNTRL)<sup>32</sup>, Trichoplein (TCHP)<sup>33</sup>, CEP128<sup>17</sup>, CEP19<sup>34</sup>, CCDC120 and CCDC68<sup>35</sup>).  
89 ODF2/Cenexin is a fibrillar protein related to the intermediate filament (IF) superfamily that plays  
90 a critical role in basal foot assembly since lack of basal foot-specific ODF2/Cenexin isoform  
91 results in loss of the entire structure<sup>4,5,12,36</sup>. ODF2/Cenexin interacts with TCHP, an IF-binding  
92 protein implicated in the recruitment of NIN to subdistal appendages<sup>33</sup>. NIN and CEP170 have  
93 been implicated in microtubule anchoring and nucleation functions<sup>38,39,40</sup>. Recently, CEP19 and  
94 CC2D2A have been assigned to subdistal appendages with the latter shown to play a critical role  
95 in their assembly<sup>34,29</sup>.

96 Despite the information has accumulated on individual proteins, to date a comprehensive  
97 and quantitative view of the molecular architecture of the basal foot is still lacking. Moreover, it  
98 remains unknown how the basal foot's organization changes in different cilia or in subdistal  
99 appendages to accommodate its specific functions.

100 Here, we resolve the structure of the basal foot in cilia *in situ* using super-resolution  
101 microscopy revealing an architecture composed of three regions linked by elongated proteins,  
102 which is partly conserved in different types of cilia. Unexpectedly, our super-resolution analysis  
103 reveals a novel “hybrid” cilium in multiciliated cells characterized by a basal body with multiple  
104 basal feet. The hybrid cilium originates from parental centrioles and presents structural features of

105 a motile cilium. Functional analysis using airway cells from healthy individuals and patients with  
106 immotile cilia syndrome suggests that the hybrid cilium position is dependent on flow generated  
107 by the surrounding motile cilia. Altogether, our data show that not all motile cilia are identical  
108 beating machines in a multiciliated cell. Furthermore, they provide evidence of a novel sensing  
109 mechanism in multiciliated epithelia.

110

## 111 **Results**

### 112 ***Super-resolution Microscopy and BioID Reveals Structural Organization and Novel*** 113 ***Components of the Basal Foot***

114 To determine the molecular architecture of the basal foot *in situ*, we first focused on primary  
115 cilia from immortalized Retinal Pigment Epithelia 1 (hTERT-RPE1) cells, a cellular model  
116 characterized by robust ciliation and homogenous ciliary structure. We reasoned that 3DSIM  
117 microscopy resolution power ( $\sim 125$  nm in x/y and  $\sim 250$  nm in z axis)<sup>41,42,43</sup> was sufficient to assign  
118 proteins to the basal foot and/or to other ciliary regions (Fig. 1a). To test this, we examined the  
119 distribution of NIN, a basal foot protein reported to have different sub-populations at the basal  
120 body<sup>44</sup>. Using 3DSIM, we clearly distinguished three sub-populations of NIN: one at the proximal  
121 end of the basal body, one at the daughter centriole, and a third at the basal foot, which extends  
122 laterally at the distal end of the basal body (Fig. 1b). We then quantitatively mapped the position  
123 of all reported basal foot/subdistal appendage proteins relative to the centre of the basal body  
124 measured by polyglutamylated-Tubulin, a modification of centriolar microtubules that is a proxy  
125 for the outer diameter of centrioles ( $\sim 200$  nm; Fig. 1c)<sup>45</sup>. Since 3DSIM resolution is maximum in  
126 the x/y plane, in-plane end-on and side-views were selected for measurement from hundreds of  
127 micrographs with basal foot proteins labeled with 488-conjugated secondary antibodies to ensure  
128 highest resolution power (Fig. 1c, Sup. Fig. S1).

129 Notably, 3DSIM mapping shows that basal foot proteins are clustered into spatially  
130 separated regions (Fig. 1d, Table S1). NIN and CEP170 are the most distant from the centriole  
131 center ( $248\pm 16$  nm and  $237\pm 25$  nm, respectively), consistently with their association with  
132 microtubules<sup>26,38,39</sup>. Therefore, this region was termed the microtubule-anchoring region or region  
133 III. Most basal foot proteins are clustered with ODF2, a component critical for basal foot  
134 assembly<sup>4,5</sup> (ODF2:  $155\pm 16$  nm; CEP128:  $139\pm 15$  nm; CEP19:  $166\pm 15$  nm; and CNTRL:  $153\pm 18$   
135 nm; TCHP:  $135\pm 15$  nm; Galactin-3 shows a broad distribution centred around this region ( $185\pm 36$   
136 nm). Since this intermediate region contains ODF2, it was termed the scaffolding region or region  
137 II. Interestingly, our imaging map shows a gap where the basal body connects to the basal feet, a  
138 region that was termed the basal body anchoring region or region I. Among the proteins previously  
139 assigned to the basal foot/subdistal appendage,  $\epsilon$ -tubulin, CCDC120, CCDC68 could not be  
140 reliably detected at the basal foot with available commercial antibodies, while TCHP, a protein  
141 thought to be associated only with subdistal appendages<sup>31,35</sup>, was located to the basal foot in  
142 primary cilia. To correctly assign proteins to the basal foot, we then measured the position of basal  
143 foot proteins along the axoneme relative to the proximal end of the basal body (Fig. 1c, e). As  
144 expected, most basal foot proteins were distributed in the same axial region (209-284 nm), with  
145 the exception of CC2D2A, whose c-termini was located significantly above the basal foot ( $333\pm 22$   
146 nm) and below the transition zone labeled with RPGRIP1L, a *bona fide* transition zone protein that  
147 is part of the Y-links ( $393\pm 90$  nm; Fig. 1e)<sup>46</sup>. This suggests that CC2D2A is located not  
148 exclusively within the basal foot region.

149 To ensure basal foot structural integrity, we hypothesized that some proteins must be  
150 connecting different regions of this supramolecular assembly together as molecular linkers either  
151 in the form of pearls on a string and/or elongated proteins<sup>47,48,49</sup>. Since most basal foot proteins  
152 showed similar distribution variances, linkers were likely to be high-molecular weight, elongated

153 coiled-coil proteins, similar to centrosomal proteins of the pericentriolar material<sup>47</sup>. We then used  
154 antibodies and GFP-fusion proteins labeling different protein domains to identify their position  
155 within the basal foot (Fig. 1f). Notably, CNTRL was found to link regions II and III by extending  
156 over a distance of  $\sim 75$  nm (CNTRL C-Terminal Domain (CTD):  $153 \pm 18$  nm; GFP-CNTRL:  
157  $240 \pm 19$  nm; Fig. 1g). CEP128 also showed an extended organization, but not as far from the basal  
158 body as CNTRL (CEP128 CTD:  $139 \pm 15$  nm; GFP-CEP128:  $203 \pm 16$  nm; Fig. 1g). Interestingly,  
159 NIN also showed an elongated distribution looping back toward region II (Sup. Fig. S2, Sup. Table  
160 S2). In contrast, CEP170 did not appear extended consistently with its lack of coiled-coil domains  
161 (CEP170 CTD:  $237 \pm 25$  nm; Middle Domain (MD):  $231 \pm 22$  nm; N-terminal Domain (NTD):  
162  $244 \pm 22$  nm, Fig. 1g). Altogether, our data rule out a model where a single basal foot component  
163 spans the whole structure acting as a scaffold for the recruitment of other components. It shows  
164 instead that the basal foot is organized in distinct structural regions: region III is the microtubule-  
165 anchoring/nucleation region made of proteins CEP170 and NIN corresponding to the basal foot  
166 cap; region II consists of the majority of known basal foot proteins (TCHP, CEP128, ODF2,  
167 CEP19 and CNTRL) and region I anchors the basal foot to the basal body, though its composition  
168 is not yet well characterized. Subdistal appendages show a similar architecture to the basal foot of  
169 primary cilia, suggesting that their structure remains largely conserved during the transition from  
170 centrioles to basal bodies in primary cilia despite the change in the number of appendages and/or  
171 possible changes in composition (Sup. Fig. S3, Sup. Table S3).

172         Since our map showed few basal foot proteins in the region closer to the basal body, this  
173 suggested that new basal foot proteins might have yet to be identified and if so, they should be  
174 located in close proximity to CEP128, the coiled-coil protein nearest to the basal body. To test  
175 this possibility, we mined BioID data from datasets that used BirA\* fused to the N-terminus of  
176 CEP128 (BirA\*-CEP128), the furthest CEP128 domain from the basal body (Fig. 1f)<sup>34</sup>, and

177 performed Bio-ID experiments using CEP128-BirA\* , where BirA\* is fused to C-terminus of  
178 CEP128, the closest domain of CEP128 to the basal body (Fig. 1g). CEP128 proximity map  
179 included many centrosomal, ciliary and satellite proteins as expected, but also components of  
180 different cytoskeletal structures including actin and intermediate filaments. To identify novel  
181 components of the basal foot, we then followed up on CEP112, a protein previously assigned to  
182 the centrosome<sup>50</sup> that is enriched in coiled-coil domains and was identified in BioID experiments  
183 in close proximity to both centriolar marker CEP135 and to basal foot region II marker CNTRL.  
184 Immunolabeling of CEP112 with two antibodies raised against different epitopes of the protein  
185 showed a localization pattern consistent with that of a basal foot protein located close to the basal  
186 body centre (CTD: 128±13 nm; MD: 142±14 nm), with a second population at the daughter  
187 centriole (Fig. 1h, Sup. Fig. S4).

### 188 ***Super-resolution Microscopy of the Basal Foot in Motile Cilia***

189 We next asked whether the architecture of the basal foot was conserved in motile cilia.  
190 Since the basal foot plays an important structural role linking motile cilia together to ensure proper  
191 beating coordination, it is likely organized differently than in primary cilia<sup>11,4,5</sup>. TEM micrographs  
192 of basal foot from sections of human airway multiciliated cells suggest both structural similarities  
193 and differences (Fig. 2a). The basal foot appears by EM as a conical structure (h= ~130 nm and  
194 w= ~200 nm) attached to the basal body by three microtubule triplets with several electron-dense  
195 regions, including a bulky domain at the tip, the basal foot cap<sup>3,21</sup>. Similarly to primary cilia, the  
196 basal foot cap has a round structure with anchored microtubules (Fig. 2a, asterisk) and it appears  
197 connected with the central region of the basal foot by fibrils (Fig. 2a, blue arrowhead). Differently  
198 from primary cilia, the basal foot is wrapped by two spherical structures symmetrically positioned  
199 close to and on the side of the tip and it is connected to the basal body by arches originating from  
200 three axonemal microtubules triplets (Fig. 2a, red arrowheads).



201 To assign basal foot proteins *in situ* in motile cilia, we used POC1B a component of the  
202 basal body as a reference marker (Fig. 2b)<sup>51,52</sup>. Since in motile cilia there is only one basal foot per  
203 basal body, the pattern of basal foot proteins by 3DSIM appeared as a diffraction-limited spot, and  
204 not as a ring-pattern as observed in primary cilia (Fig. 1b, c). Taken together, the molecular map  
205 data show that basal foot molecular architecture is only partly conserved between motile and  
206 primary cilia (Fig. 2d, e, Sup. Table S4). NIN and CEP170 are located at the basal foot tip together  
207 with  $\gamma$ -Tubulin and NEDD1, proteins which are part of the  $\gamma$ TuRC microtubule nucleating complex  
208 <sup>53</sup>. The position of  $\gamma$ -Tubulin and NEDD1 was measurable only in motile cilia since basal bodies  
209 are largely devoid of Pericentriolar Material, the protein network surrounding the centriolar core<sup>54</sup>.  
210 Region II components CEP128 (162±25 nm) and ODF2 (158±16 nm) in motile cilia showed  
211 similar distances from the centriole wall as in primary cilia, while CNTRL is located further away  
212 from the basal body centre (180±23 nm and 153±18 nm, respectively) suggesting a distinct  
213 organization of this bridging protein in motile cilia. Notably, STORM microscopy shows that  
214 CNTRL is distributed in two main populations at the basal foot, located on opposite side of its  
215 longitudinal axis (Fig. 2f). Comparison of the measurements from EM micrographs with the ones  
216 from super-resolution images suggests that CNTRL fluorescence is located where two electron-  
217 dense spherical structures are detected in EM sections (distance of the basal body center to  
218 spherical structures by EM: 190±15 nm; CNTRL distance from basal body center by 3DSIM:  
219 180±23 nm). In fully differentiated multiciliated cells, CEP112 was observed as a small arch on  
220 one side of the basal body in close proximity to Cep128 (d=165±28 nm, Fig.2g) or a more closed  
221 ring in cells that appear not completely mature suggesting a dynamic distribution of the protein  
222 during differentiation (Sup. Fig. 5a). Cep19, on the other hand, forms a complete ring more similar  
223 to distal appendages proteins throughout docking and motile cilia extension. Lastly, TCHP showed  
224 a complex filamentous distribution that did not allow accurate measurements (Sup. Fig. S5).

225 Altogether, our data show that basal foot architecture in primary and motile cilia is composed of  
226 modular regions that are largely conserved away from the basal body, while different in the basal  
227 body attachment region.

### 228 ***Super-resolution Reveals a Novel Type of Cilium in Airways Multiciliated Cells***

229 The comparison of the super-resolution maps of basal foot in primary and motile cilia  
230 indicated that functionally different cilia have structural and numerical differences: there are  
231 multiple basal foot per basal body in primary cilia, and only one basal foot per basal body in motile  
232 cilia (Fig. 1b and Fig. 2b). In human multiciliated cells, it was therefore surprising to observe a  
233 ring pattern of basal foot proteins, since at the base of motile cilia only a single basal foot per basal  
234 body was thought to be present (Fig. 3a and Sup. Fig. S6). This arrangement suggested the presence  
235 of a basal body similar to the primary cilium one.

236 3DSIM and STORM micrographs from human multiciliated cells co-labeled with  
237 antibodies recognizing basal foot (CNTRL, CEP128) and basal body (POC1B) proteins  
238 demonstrated that the ring pattern resulted from a basal body with multiple basal feet and not from  
239 multiple basal bodies clustering together as in the compound cilia, a membrane-delimited structure  
240 made of multiple motile cilia clustered together and frequently found in airway cells after injury<sup>55</sup>  
241 (Fig. 3a, c; Sup. Fig. S6). To further confirm its *in vivo* relevance and organization, we established  
242 its presence in freshly isolated human upper airway cells (Fig. 3b) and in TEM micrographs (Fig.  
243 3d). Furthermore, we then used 3DSIM to verify that an axoneme is emerging from it therefore  
244 demonstrating that this special basal body templates a cilium (Fig. 3e).

### 245 ***The Novel Cilium has Hybrid Features of Primary and Motile Cilia***

246 Next, we examined the ultrastructure of this unique cilium using Focus Ion Beam-Scanning  
247 Electron Microscopy tomography (FIB-SEM). Analysis of tomogram sections (Fig. 4a-c, Sup.

248 Movie 1, 2) confirmed that the basal body templates a bona fide cilium and demonstrated that its  
249 axoneme contains a central pair similar to the surrounding motile cilia (Fig. 4a, b and Sup. Video  
250 1-3). 3DSIM micrographs of airway multiciliated cells labeled with anti-radial spoke head  
251 (RSPH4A) and nexin-dynein regulatory complex (GAS8) antibodies further demonstrated that this  
252 special cilium harbors proteins specific for the ciliary beating machinery (Fig. 4d)<sup>56,57</sup>. Altogether,  
253 our data show that in human multiciliated cells of the airway, not all the cilia are identical; rather,  
254 a single cilium per cell on average presents hybrid features of primary and motile cilia.

### 255 ***Hybrid Cilium is Conserved in Different Mammalian Multiciliated Cells and Originates from*** 256 ***Parental Centrioles***

257 To determine if the hybrid cilium is conserved in other multiciliated cells and mammalian  
258 species, we examined multiciliated cells differentiated from progenitor basal cells isolated from  
259 adult mouse tracheal and ependymal tissue (Fig. 5a, b). Notably, when using 3DSIM microscopy  
260 and TEM we observed a basal body surrounded by multiple basal feet in these multiciliated cells  
261 demonstrating that the hybrid cilium is present in multiple tissues in mice and humans.

262 The presence of multiple basal feet typical of primary cilia suggested that the hybrid cilium  
263 might be derived from the parental (mother) centriole, which first templates the primary cilium  
264 present during the early stages of differentiation of airway multiciliated cells, and then is resorbed  
265 before centriole amplification through the canonical and deuterosome pathway<sup>58,59,7</sup>. To first test  
266 whether the mother and daughter centrosomal centrioles are retained in differentiated multiciliated  
267 cells<sup>58,60</sup>, we performed a pulse-chase experiment which allowed us to label differentially  
268 centrosomal centrioles from newly formed basal bodies in mouse cultured ependymal cells  
269 (Supplemental Fig. S7). Time-lapse monitoring of RFP-Cen1 centrosomal centrioles in cells from  
270 Cen2-EGFP transgenic mice<sup>61</sup> showed that centrosomal centrioles are retained within the newly  
271 formed basal body patch (Fig. 5c) and are capable of growing cilia (Fig. 5d). To further test that

272 they indeed provide a template for the hybrid cilium, we used Centrinone, a small molecule drug  
273 blocking canonical centriole duplication by inhibiting Plk4, a kinase critical for the early stages of  
274 centriole duplication<sup>62</sup>. As expected, basal cells isolated from mouse trachea treated with  
275 Centrinone showed a reduction in the number of centrioles before airway cells differentiation into  
276 an airway epithelia organoid model through Air Liquid Interphase (ALI) (d0) (Fig. 5e, f).  
277 However, although Centrinone treatment during basal cell expansion in mouse cells does not  
278 impact the number of multiciliated cells (Fig. 5e, f), it causes a reduction in hybrid cilia number in  
279 terminally differentiated cells, suggesting that the hybrid cilium originates from parental centrioles  
280 (Fig. 5g, h).

### 281 *Hybrid Cilium Is a Signaling Centre and Flow Sensor*

282 It has been previously shown that during multiciliated cells differentiation, motile cilia first  
283 generate fluid flow, then fine-tune their collective beating orientation within a cell to generate a  
284 more effective fluid flow and mucociliary transport<sup>63,64,65</sup>. This observation suggested the  
285 existence of a sensing mechanism converting mechanical forces into molecular signals required to  
286 fine-tune basal body orientation at the cellular level<sup>66,67</sup>. We reasoned that if the hybrid cilium is  
287 involved in a flow sensing mechanism, its position would be biased relative to the direction of  
288 ciliary beating. To test this hypothesis, we then developed a MATLAB image analysis script that  
289 located the position of the hybrid cilium in mature multiciliated cells relative to ciliary beating  
290 direction measured by basal body-basal foot rotational polarity (Fig. 6a). To establish whether this  
291 positional bias was dependent on fluid flow, we analyzed cells from three PCD patients with  
292 independent loss of function mutations in outer dynein arm proteins (DNAH5 and DNAH11, Sup.  
293 Table 5) critical for ciliary motility, but not basal body formation and docking. As expected, all  
294 three PCD patient cells populations exhibited normal ciliation, but impaired beating, reduced basal  
295 body rotational alignment and reduced number of aligned cells relative to healthy controls<sup>68,69,70</sup>

296 (Sup. Fig. S8). Surprisingly, when the position of the hybrid cilium was measured relative to motile  
297 cilia beating direction, its position was biased toward the direction of ciliary beating in normal  
298 cells, while in airway multiciliated cells from PCD patients its position was found more centered  
299 in the cell, similarly to the position of centrosomes in cycling cells (Fig. 6b). To further confirm  
300 the biased location of the hybrid cilium, we next assessed its position relative to the cell membrane  
301 irrespective of motile cilia beating direction. Consistent with the previous analysis, in cells from  
302 PCD patients the hybrid cilium was located closer to the cell center ( $0.80 < \text{mean ratio} < 0.85$ ), while  
303 in cells from healthy controls the hybrid cilium was found at a similar distance from the cell center  
304 and the cell membrane (mean ratio of distances to the center vs membrane = 0.97) (Fig. 6c).  
305 Altogether, our data show that the hybrid cilium position is dependent on flow direction suggesting  
306 that the hybrid cilium functions as a flow sensor.

307 To act as a sensor, the hybrid cilium must be competent for signalling. Since basal foot  
308 protein CEP128 has been previously linked to TGF $\beta$  signalling in primary cilia<sup>71</sup>, we then  
309 examined whether activated TGF $\beta$  receptors were found at the hybrid cilium consistently with a  
310 sensing role. When airway multiciliated cells were labeled with an antibody recognizing  
311 phosphorylated, activated TGF $\beta$ RI<sup>72,73</sup> phospho-TGF $\beta$ RI was found enriched at the basal bodies  
312 of airway primary and motile cilia throughout the differentiation process including at the base of  
313 the hybrid cilium (Fig. 6d). Collectively, these results suggest that the hybrid cilium is not only a  
314 fully functional motile cilium, but also a signalling antenna whose position is linked to the direction  
315 of beating.

316

317

318

## 319 **Discussion**

### 320 *The Architecture of The Basal Foot Revealed by Super-resolution Microscopy*

321 Here, we present the super-resolution molecular map of the basal foot and show that the  
322 basal foot has an architecture characterized by different protein regions linked by elongated coiled-  
323 coil components, which bridge different parts of the basal foot. Our data show that the basal foot  
324 in primary cilia and subdistal appendages share a conserved architecture, while basal foot in motile  
325 cilia presents a more complex structure, with arches connecting basal foot to the basal body and  
326 an overall more compact organization of region II and III relative to primary cilia. This  
327 organization most likely reflects the different mechanical requirements that the basal foot in motile  
328 cilia is subject to during ciliary beating. We initially hypothesized that the basal foot was built  
329 upon an ODF2/Cenexin molecules infrastructure. ODF2, a highly insoluble, self-interacting  
330 protein that forms a fibrillar structure is required for basal foot formation and is thought to have  
331 an indirect association with microtubules<sup>27,74,17,33,5,4</sup> and recruits CEP128, TCHP, CNTRL, NIN  
332 and CEP170. However, our super-resolution map shows that ODF2 is rather a scaffold of region  
333 (II), which is then required for assembly of region III.

334 STORM and 3DSIM super-resolution imaging of basal foot reveals that CNTRL plays a  
335 role as a linker by connecting regions II and III along the longitudinal axis of the basal feet. In  
336 addition, in motile cilia CTRLN laterally forms two domains that are symmetrically positioned on  
337 opposite sides of the basal foot as a zipper suggesting that CTRLN provides a flexible architectural  
338 element that can be adapted to build different assemblies.

339 Quantitative molecular mapping directed our attention to the region of attachment of the  
340 basal boot to the basal body leading to the identification of CEP112 as a novel basal foot protein  
341 in close proximity to CEP128 and providing through BioID mapping a candidate list for future

342 studies. Last, the basal foot map clarifies the distribution of reported basal foot proteins such as  
343 CC2D2A, TCHP and CEP19. We show that CC2D2A and TCHP are not classic basal foot  
344 proteins, a notion supported by studies of the transition zone region<sup>75,76</sup>. Our map also shows that  
345 CEP19 resides above the basal foot at a distance from the basal body consistent with the  
346 measurements from Kanie et al. (Sup. Fig. S5,  $d=334\pm 38\text{nm}$  (our data);  $d=372.6\pm 16.4\text{nm}$ <sup>77</sup>). This  
347 observation is supported by recent evidence suggesting that CEP19 forms a functional complex  
348 with FOP and CEP350, distal appendage proteins required for an early step of ciliogenesis<sup>77,78,79</sup>.

### 349 *A Novel Cilium in Airway Multiciliated Cells*

350 Our data reveal the fate of parental centrioles in mature multiciliated cells. In airway cells,  
351 during the early stages of differentiation—before Foxj1 expression—the mother centriole  
352 templates a primary cilium that is subsequently re-adsorbed before centriole amplification<sup>7</sup>. After  
353 this step, its role has remained mysterious. Here we show that parental (mother) centrioles  
354 resurface to give rise to a hybrid cilium harbored among motile cilia. This hybrid cilium has  
355 features of motile and primary cilia, that is multiple basal feet as a primary cilium and a central  
356 pair apparatus and proteins required for ciliary beating as a motile cilium. Interestingly, the hybrid  
357 cilium is evolutionarily conserved in mammalian multiciliated cells, but it has not yet been  
358 identified in lower organisms such as xenopus pointing to species-specific differences.

359 The hybrid cilium is preferentially positioned toward the direction of ciliary beating. This  
360 biased position is reminiscent of the primary cilium at the leading edge in the wound region in  
361 vascular and bronchial smooth muscle cells, where it is thought to sense extra-cellular matrix  
362 proteins and promote cell migration<sup>80,81</sup>. Since effective flow generated by beating motile cilia is  
363 required to maintain the preferred position of the hybrid cilium this suggests that it senses flow  
364 either directly or indirectly. The notion of a cilium with functional attributes of motile and sensory  
365 cilia has been previously proposed in human tracheal epithelial and mouse oviduct epithelial

366 cells<sup>82,83</sup>. Moreover, in lower organisms such hybrid motile-sensory cilia exist, but they have been  
367 lost during the course of evolution in higher organisms<sup>84,85</sup>. Consistent with a role in sensing, the  
368 parental basal body harbors phosphorylated TGF $\beta$ I receptors, providing a means for signal  
369 amplification and compartmentalization around its location by possibly regulating relative  
370 intensities. TGF $\beta$  is a complex signalling pathway integrated with multiple cellular processes,  
371 whose downstream responses are cell and context dependent<sup>86</sup>. TGF $\beta$  signalling has been  
372 previously associated with basal foot in primary cilia<sup>71,87</sup>, and in multiciliated epithelia it has been  
373 shown to control motile cilia length independently from transcriptional programs responsible for  
374 multiciliogenesis<sup>88</sup>. It is therefore possible that the parental basal body provides a signalling hub  
375 in multiciliated cells to sense optimal/altered flow during differentiation or epithelial-to-  
376 mesenchymal transition during tissue injury or inflammation, processes linked to TGF $\beta$  signalling  
377 in airway cells<sup>83</sup>. Future studies are needed to address the downstream molecules and physiological  
378 effects of TGF $\beta$  signalling through the parental basal body in the airways.

## 379 **Methods**

### 380 ***Immortalized and Primary Cell Culture***

381 hTERT-RPE1 cell line (source: ATC<sup>®</sup> CRL-4000<sup>™</sup>) was cultured in DMEM medium containing  
382 10% FBS. HEK293 Flp-In T-Rex cells were cultured in the DMEM medium containing 10% FBS  
383 (Tetracycline-free). For ciliation, RPE-1 and HEK293 cells were serum-starved with DMEM/F-  
384 12 media for 48-72 hours. Human primary nasal airway cells from healthy volunteers and PCD  
385 patients were collected using a cytology brush by a nurse, with a protocol approved by Research  
386 Ethics Board at the Hospital for Sick Children. Airway cells were then expanded, seeded on  
387 transwells (Corning HTS Transwell-96 and -24 permeable support; 0.4  $\mu$ m pore size), and  
388 differentiated for at least 21 days following Stem Cell Technologies protocols using PneumaCult-



389 Ex and PneumaCult-ALI media. The media were supplemented with vancomycin, tobramycin,  
390 gentamicin and antibiotic-antimycotic antibiotics.

### 391 ***Transfection***

392 hTERT-RPE1 cells were transfected using Lipofectamine 3000 Kit (Invitrogen) according to  
393 manufacturer instruction. Cells were analyzed for downstream applications at 48-72 hours post  
394 transfection (hpt).

### 395 ***Cloning and Plasmids***

396 Please refer to *Supplemental materials* (Table S6) for a list of plasmids and primers used in this  
397 study.

### 398 ***Antibodies***

399 Please refer to *Supplemental materials* (Table S7) for a list of antibodies used in this study.

### 400 ***Immunofluorescence***

401 RPE-1 cells were fixed on coverslips, and human nasal and mouse tracheal multiciliated cells from  
402 ALI cultures were directly fixed on transwell filters with either methanol (20 min at -20 °C) or 4  
403 % Paraformaldehyde (PFA; 10 min at RT). For PFA fixation, cells were subsequently reduced  
404 with 0.1% Sodium Borohydride for 7 minutes, then permeabilized with 0.2 % Triton X-100 for 25  
405 minutes. Cells were blocked using 5% FBS-containing PBS, incubated with primary antibodies  
406 for either 1 hour (RT) or overnight (4 °C), and then secondary antibodies conjugated with  
407 Alexafluor -405, -488, -555 and -647 nm (Thermo Fisher Scientific). When appropriate, cells were  
408 stained with directly labeled primary antibodies (prepared using APEX Antibody Labelling Kit,  
409 Thermo Fisher Scientific and Mix-n-Stain Antibody Labeling Kit, Sigma-Alrich). Cells were  
410 nuclei stained with HOESCHT33342.

411 ***Super-resolution Imaging***

412 3DSIM data was collected using ELYRA PS.1 (Carl Zeiss Microscopy) with a Plan-Apochromat  
413 63x or 100x/1.4 Oil immersion objective lens with an additional 1.6x optovar. An Andor iXon  
414 885 EMCCD camera was used to acquire images with 101 nm/pixel z-stack intervals over a 5-10  
415  $\mu\text{m}$  thickness. For each image field, grid excitation patterns were collected for five phases and  
416 three rotation angles ( $-75^\circ$ ;  $-15^\circ$ ,  $+45^\circ$ ). The raw data was reconstructed and channel aligned  
417 using SIM module of ZEN Black Software (version 8.1). 2D-STORM data was collected using  
418 PALM mode in ELYRA PS.1 (Carl Zeiss Microscopy) with a Plan-Apochromat 63x or 100x/1.4  
419 Oil immersion objective lens with an additional 1.6x optovar. An Andor iXon 885 EMCCD  
420 camera was used to acquire images using TIRF mode. Lasers of wavelength 647 nm and 405 nm  
421 (if necessary) were used to activate the fluorophore. Raw data was reconstructed using PALM  
422 module of Zen Black Software (version 8.1), with the account for overlapping molecules.  
423 Reconstructed data was further processed for drift correction and binning using home-written  
424 MATLAB script (can be accessed via the following link:  
425 <https://drive.google.com/open?id=11fuWn7kmZ-loCn79CKChJI5FeMme0fDU>).

426 ***Transmission Electron Microscopy (TEM)***

427 ALI filters of fully differentiated human nasal multiciliated cells were fixed in 2% glutaraldehyde  
428 in 0.1M sodium cacodylate buffer. Samples were rinsed in 0.1M sodium cacodylate buffer with  
429 0.2M sucrose, post-fixed in 1%  $\text{OsO}_4$  in 0.1M sodium cacodylate buffer, dehydrated in a graded  
430 ethanol series (70%, 90%, 3X 100%), infiltrated with propylene oxide, and embedded in Quetol-  
431 Spurr resin. Serial sections (90 nm-thickness) were cut on a Leica Ultracut ultramicrotome, stained  
432 with uranyl acetate and lead citrate, and imaged in a FEI Tecnai 20 TEM.

433 ***Focused Ion Beam Scanning Electron Microscopy (FIB-SEM)***

434 ALI filters of fully differentiated human nasal multiciliated cells were fixed in 2.5%  
435 glutaraldehyde and 0.05% malachite green oxalate in 0.1M sodium cacodylate buffer, rinsed in  
436 0.1M sodium cacodylate buffer, post-fixed in 0.8% potassium ferrocyanide and 1% OsO<sub>4</sub> in 0.1M  
437 sodium cacodylate buffer. The samples were treated with 1% tannic acid, stained with 0.5% uranyl  
438 acetate, followed by dehydration in a graded acetone series (25%, 50%, 75%, 95% and 100%),  
439 and embedded in resin. Resin formulation: 18.2% Araldite M (Sigma-Aldrich), 22.7% Epon 812  
440 (Sigma-Aldrich), 54.5% Hardener DDSA (Sigma-Aldrich) and 4.5% DMP-30 (Sigma-Aldrich).  
441 FIB-SEM imaging for Sup. Movie 1,2 was performed as described below. Sample blocks for  
442 analysis by FIB-SEM were trimmed and mounted on a 45° pre-titled SEM stub and coated with a  
443 4-nm layer of Pt to enhance electrical conductivity. Milling of serial sections and imaging of block  
444 face after each Z-slice was carried out with the FEI Helios Nanolab 660 DualBeam using Auto  
445 Slice & View G3 ver 1.5.3 software (FEI Company, Hillsboro, OR USA). A block was first imaged  
446 to determine the orientation relationship between the block face of ion and electron beams. A  
447 protective carbon layer 50 μm long, 8 μm wide and 2 μm thick was deposited on the surface of the  
448 region of interest to protect the resin volume from ion beam damage and correct for stage and/or  
449 specimen drift, i.e., perpendicular to the image face of the volume to be milled. Trenches on both  
450 sides of the region of interest were created to minimize re-deposition during automated milling  
451 and imaging. Imaging fiducials were generated for both ion and electron beam imaging and were  
452 used to dynamically correct for drift in the x- and y-directions by applying appropriate SEM beam  
453 shifts. Ion beam milling was performed at an accelerating voltage 30 kV and beam current of 9.3  
454 nA, stage tilt of 9°, and working distance of 4 mm. With each milling step, 10 nm thickness of the  
455 material was removed. Each newly milled block face was imaged with the through-the-lens  
456 detector for backscattered electrons (TLD-BSE) at an accelerating voltage of 2 kV, beam current

457 of 0.4 nA, stage tilt of 47°, and working distance of 3 mm. The pixel resolution was 10.3 nm with  
458 a dwell time of 30  $\mu$ s. Pixel dimensions of the recorded image were 1536 x 1024 pixels. Seven  
459 hundred and forty-three images were collected and the images contrast inversed. Visualization and  
460 direct 3-D volume rendering of the acquired dataset was performed with Amira 6.0.1 (FEI  
461 Company, Hillsboro, OR USA). FIB-SEM imaging for Sup. Movie 3 was performed as describe  
462 previously<sup>89</sup>.

### 463 **Western Blot**

464 Total cell lysates were collected using RIPA lysis buffer (Pierce, Thermo Fisher Scientific) freshly  
465 added with protease inhibitor (Roche, Sigma-Aldrich). Lysates were loaded on 4-12 or 8% Bis-  
466 Tris Plus gels. Proteins were transferred to a nitrocellulose membrane and blocked using 5% Skim-  
467 milk in TBST. Protein blots were sequentially incubated with primary and HRP-conjugated  
468 secondary antibodies diluted in 5% BSA in TBST. Blots were developed using the Novex ECL  
469 Chemiluminescent Substrate Kit (Invitrogen).

### 470 ***Bio-ID Assay***

471 HEK293 Flp-In T-Rex cells were first co-transfected with the pcDNA5/FRT/TO CEP128-FLAG-  
472 BirA\* plasmid and Flp Recombinase Expression plasmid pOG44 (1:20 ratio) and selected for  
473 stable expression with Hygromycin B and Blasticidin. Stable CEP128-FLAG-BirA\* HEK293 Flp-  
474 In T-Rex cell line was induced for BirA expression and biotinylated for 24 hrs with 1  $\mu$ g/ml  
475 tetracycline and 50  $\mu$ M biotin. For ciliation experiments, cells were serum-starved to for 72 hrs.  
476 Cells were then collected and processed for Bio-ID and FLAG Immunoprecipitation (IP)  
477 experiments as described previously<sup>90</sup>.

### 478 ***MTEC and ependymal cell experiments***

479 Mouse tracheal epithelia cell (MTEC) cultures were established as previously described<sup>91,92</sup>.  
480 Briefly, C57BL/6 mice were sacrificed at 2–4 months of age, trachea were excised, opened  
481 longitudinally to expose the lumen, and placed in 1.5 mg/mL Pronase E in DMEM/F12 medium  
482 (Life Technologies) at 4°C overnight. Tracheal epithelial cells were dislodged by gentle agitation  
483 and collected in DMEM/F12 with 10% FBS. After centrifugation, cells were treated with 0.5  
484 mg/mL DNase I for 5 min on ice and centrifuged at 4°C for 10 min at 400 g. Cells were  
485 resuspended in DMEM/F12 with 10% FBS and plated in a tissue culture dish for 5 h at 37°C with  
486 5% CO<sub>2</sub> to adhere contaminating fibroblasts. Non-adhered cells were then collected, concentrated  
487 by centrifugation, resuspended in an appropriate volume of mTEC-Plus medium<sup>92</sup>, and seeded  
488 onto Transwell-Clear permeable filter supports (Corning).

489 To eliminate parental centrioles, cells were incubated in the presence of 1 μM Centrinone A<sup>62</sup> for  
490 6 days. Air-liquid interface (ALI) was established 2 days after cells reached confluence by feeding  
491 mTEC-Serum-Free medium<sup>92</sup> only in the lower chamber. Cells were cultured at 37°C with 5%  
492 CO<sub>2</sub>, and media replaced every 2 d, and fixed on the indicated days. All chemicals were obtained  
493 from Sigma Aldrich unless otherwise indicated. Media were supplemented with 100 U/mL  
494 penicillin, 100 mg/mL streptomycin, and 0.25 mg/mL Fungizone (all obtained from Life  
495 Technologies).

496 For ependymal cell culturing, all animal studies were performed in accordance with the guidelines  
497 of the European Community and French Ministry of Agriculture and were approved by the Ethic  
498 comity Charles Darwin (C2EA-05) and “Direction départementale de la protection des populations  
499 de Paris”, (Approval number Ce5/2012/107; APAFiS #9343). The mouse strain, Cen2-GFP (CB6-  
500 Tg (CAG-EGFP/CETN2)3-4Jgg/J, The Jackson Laboratory), has already been described<sup>61</sup>. For *in*  
501 *vivo* analysis, animals used were homozygous for the Cen2-GFP. Lateral walls of the lateral brain  
502 ventricles were dissected as previously explained<sup>93</sup>. The tissue was treated with 0.1% triton in

503 BRB80 (80 mM K-Pipes pH6.8; 1 mM MgCl<sub>2</sub>; 1 mM Na-EGTA) for 1 min prior to fixation and  
504 fixed in methanol at -20°C for 10 min. Saturation and antibody incubations were performed in  
505 PBS containing 10% FBS and 0.1% triton. Primary antibodies (CNTRL (monoclonal mouse from  
506 Santa Cruz) and CEP164) were incubated overnight (4°C). Secondary antibodies conjugated with  
507 Alexa Fluor -555 and -647 were incubated for 1h.

508 For *in vitro* pulse-chase experiments, cultures were performed as previously described.  
509 Transfection of ependymal cell progenitors was performed at 80% of confluency during the  
510 proliferation phase with a CMV-TagRFP-Cen1 plasmid (gift from Xavier Morin, ENS, Paris),  
511 which codes for human centrin 1 fused to TagRFP under the control of a CMV promoter, using  
512 jetPRIME Polyplus kit. Cells (in 25cm<sup>3</sup> flask) were transfected with a mix of 0.75µg of DNA,  
513 300µL of jetPRIME Buffer and 1.5µL of jetPRIME transfection reagent in 3 mL of fresh complete  
514 medium (DMEM-Glutamax (Invitrogen) containing 10% FBS and 1% Penicillin/Streptomycin).  
515 After 4 hours at 37 °C in 5% CO<sub>2</sub> incubator, the medium was renewed. One day after proliferation,  
516 cells were shaken at 250 rpm overnight. Cells were plated on coverslips or Labtek chambers slides  
517 coated with L-Polylysine (40 µg/ml in pure water) at a density of 0.75 x 10<sup>4</sup> cells per µl in 20 or 60  
518 µl drops. The medium was then replaced by serum-free DMEM-Glutamax-I 1% P/S, to trigger  
519 ependymal differentiation *in vitro* (DIV0). Cells were either fixed with Paraformaldehyde (4% in  
520 PBS) for 10min or used for live imaging. Fixed cells were examined with an upright  
521 epifluorescence microscope (Zeiss Axio Observer.Z1) equipped with Apochromat X63 (NA 1.4)  
522 or X100 (NA 1.4) oil-immersion objectives and a Zeiss Apotome with an H/D grid. Images were  
523 acquired using Zen software with 230-nm z-steps and analyzed with image-J.

524 For live imaging, differentiating ependymal cells with two bright RFP-tagged centrosomal  
525 centrioles were selected and filmed using an inverted spinning disk Nikon Ti PFS microscope  
526 equipped with an oil-immersion X100 (NA 1.4) objective, an Evolve EMCCD Camera

527 (Photometrics), dpss lasers (491 nm, 561 nm), a motorized scanning deck and an incubation  
528 chamber (37 °C; 5% CO<sub>2</sub>; 80% humidity). Laser intensities and image capture times were  
529 respectively set to 20%, 50 ms for 488nm and 25%, 100 ms for 561nm. Images were acquired with  
530 Metamorph software at 60 minutes time interval for 24 hours. Image stacks were recorded with a  
531 z-distance of 0.7 mm. Four dimensional (x, y, z, t) time-lapse images were analyzed with Image J.

### 532 **Semi-quantitative RT-PCR**

533 RNA was purified from 1.5 x 10<sup>5</sup> cells on coverslips using the RNeasy Micro Kit (QIAGEN,  
534 74000). Retrotranscription was performed using SuperScript III First-Strand Synthesis System for  
535 RT-PCR (Invitrogen, 18080-051). PCR was performed on cDNA using the primers 5'-  
536 AGAAGAACGGCATCAAGGTG-3' and 5'-GAACTCCAGCAGGACCATGT-3' for EGFP 5'-  
537 AACACCGAGATGCTGTACCC-3' and 5'-ACGTAGGTCTCTTTGTCGGC-3' for tagRFP and  
538 5'-ACCCACCGTGTCTTCGAC-3' and 5'-CATTTGCCATGGACAAGATG-3' for  
539 cyclophilin. Images of the gels were then analysed on ImageJ. The ratio between EGFP or tagRFP  
540 and cyclophilin band intensity were calculated. Quantifications of 3 independent experiments were  
541 pooled and plotted.

### 542 ***Rotational polarity assessment and positional analysis of hybrid cilium***

543 Custom written MATLAB script was used to determine the position of the hybrid cilia in  
544 multiciliated cells relative to cilia beating direction (can be accessed via the following link:  
545 <https://drive.google.com/open?id=182KAccJf6YC69WbovKgTwtg62Y5DTadA>). First, intensity  
546 thresholds for all channels were chosen for and binary images were generated to identify individual  
547 basal body and basal foot objects. Individual cells were outlined via manual cell border drawing.  
548 Basal body-basal foot pairs were identified based on the pairwise nearest neighbor search with a  
549 distance threshold of ~600 nm. The direction of a single cilium was defined as from the weighted  
550 center of the basal body object to that of the paired basal foot. All cilia directions in one cell were

551 determined and the mean direction was regarded as the direction of beating in a cell. The cilia  
552 beating angles obtained were transformed into a two-dimensional unit vector:  $r_i = \begin{pmatrix} \cos a_i \\ \sin a_i \end{pmatrix}$ . The  
553 resultant vector was the average of all the unit vectors in a cell:  $\bar{r} = \frac{1}{n} \sum_{i=1}^n r_i$ . The resultant vector  
554 length  $r$  was defined as the norm of the resultant vector:  $r = \|\bar{r}\|$ . The circular standard deviation  
555 was defined as:  $csd = \sqrt{-2 \ln(r)}$ . All directions in a single cell were also subject to Rayleigh's  
556 test for uniformity distribution. The p-value is calculated as: p value =  
557  $e^{\left(\sqrt{(1+4n+4n^2-4r_n^2)}-(1+2n)\right)}$ ;  $r_n = r \times n$ . A p-value < 0.05 indicated that the cilia in the cell are  
558 significantly aligned. Aligned vector length was defined to describe the cilia alignment level in a  
559 cell with values ranging from 1 to 0, with 1 indicating 100% alignment and 0 indicating no  
560 alignment. The mean beating direction of all cilia were defined as the cilia beating direction. The  
561 hybrid cilia position relative to the cilia beating direction was measured using the same basal foot  
562 and basal body markers in cells whose size is normalized to [-0.5; 0.5] both along the cilia beating  
563 direction (regarded as cell length) and the direction perpendicular to it (regarded as cell width).

#### 564 ***Statistical Analysis***

565 Data was analyzed in Microsoft Excel and Prism software. Statistical tests, sample sizes and  
566 number of replicates were specified in figure legends. Differences were regarded as significant if  
567  $p < 0.05$ , unless otherwise stated.

#### 568 **Figures**



## Figure 1: 3D-SIM and BiLD reveal the molecular architecture and a novel component of basal foot in primary cilia

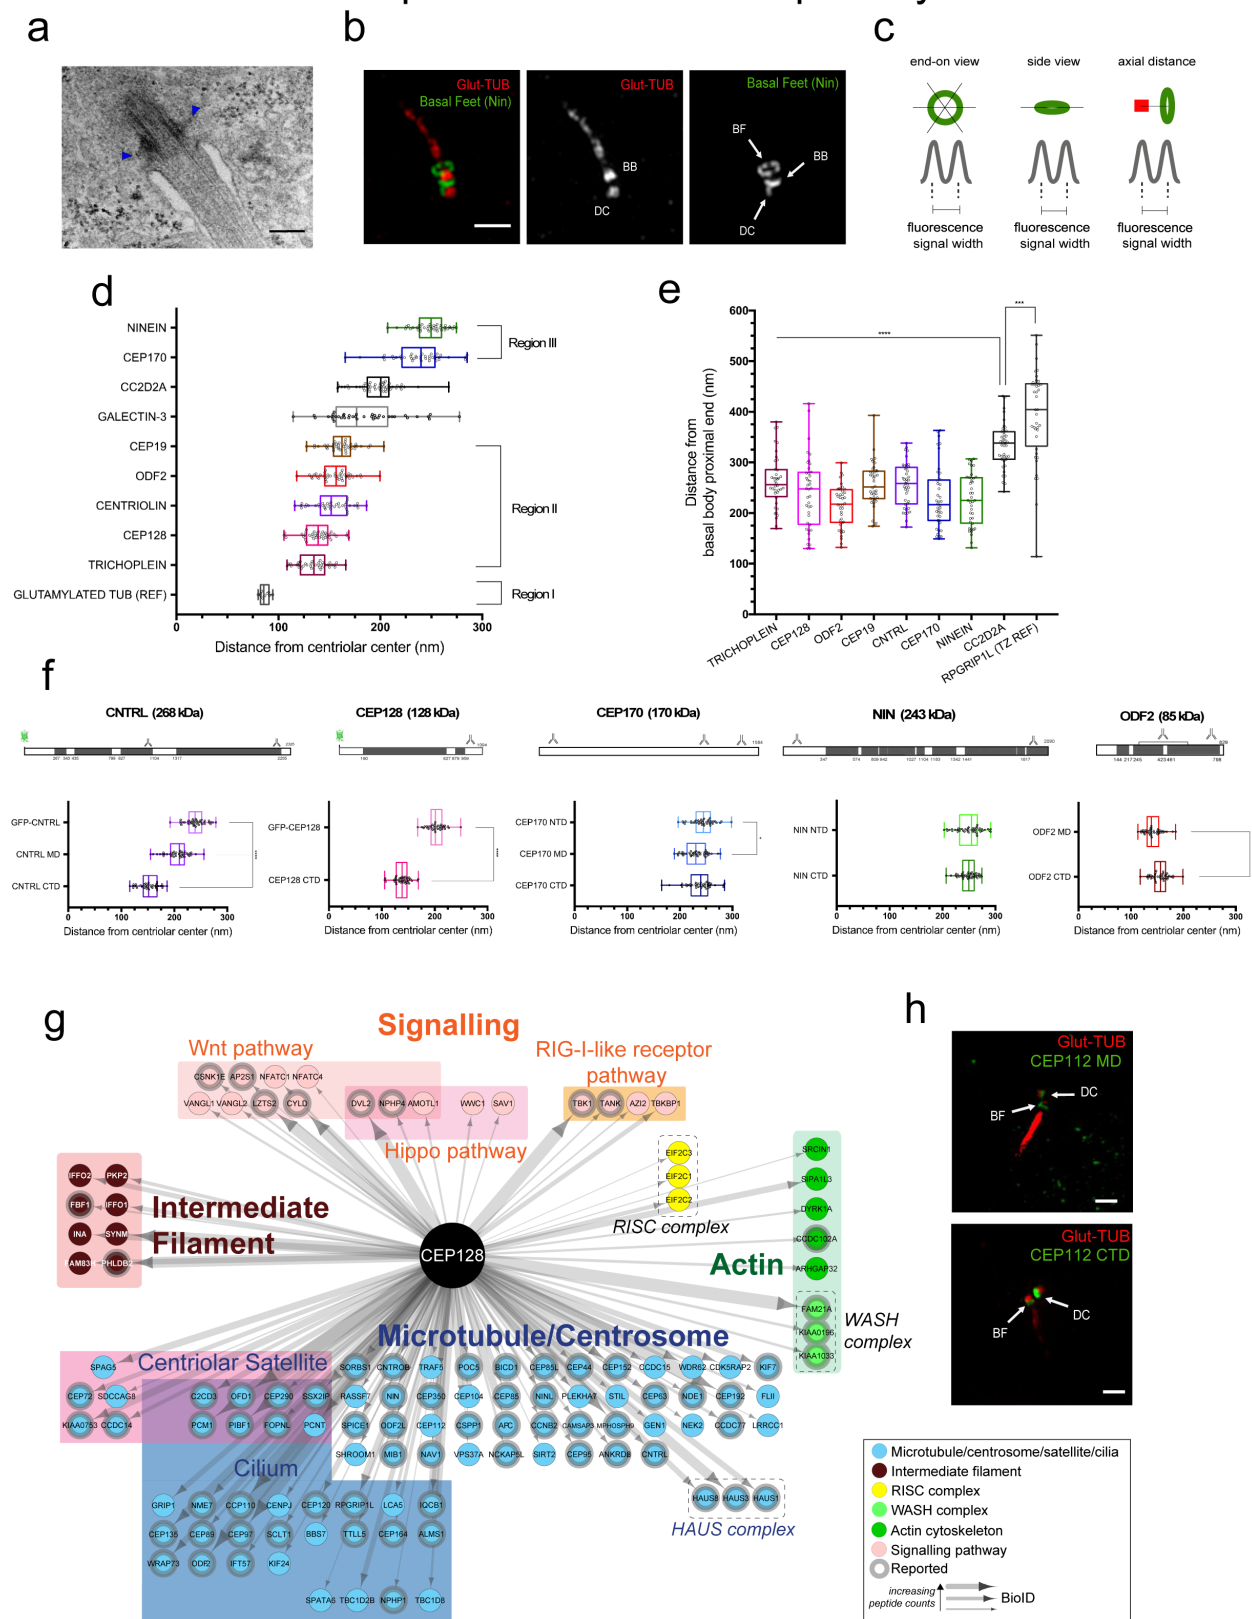

570 **Figure 1. 3D-SIM and BioID reveal the molecular architecture and a novel component of**  
571 **basal foot in primary cilia**

572 **(a)** Representative TEM micrograph of a primary cilium and its basal feet (blue arrowheads) in  
573 immortalized RPE-1 cells. Scale bar represents 200 nm. **(b)** 2D projection micrograph of 3DSIM  
574 volume of a primary cilia in RPE-1 cell stained with anti-Ninein (NIN, green) and anti-  
575 glutamylated tubulin (Glut-TUB, red) antibodies, showing the three known subpopulations of the  
576 protein: at the proximal ends of basal body, daughter centriole and at the basal feet (see arrows).  
577 Scale bar represents 1  $\mu$ m. **(c)** Cartoon depiction of the strategy used to measure radial and axial  
578 distance of basal foot proteins (green) in primary cilia. The radial distance, or distance from the  
579 centriolar center, was calculated either from end-on view by dividing each of the ring diameter  
580 measurements by two (left) or from side views by measuring the lateral distance of basal foot  
581 proteins positioned across the basal body (middle). Axial distance was measured relative to the  
582 basal body proximal end (red). **(d)** Box plot of radial distances of basal foot proteins in primary  
583 cilia of RPE-1 cells (n=40). Region assignment of proteins was based on statistical analysis by  
584 one-way ANOVA using Tukey's multiple comparison test. Distance measurements of proteins not  
585 significantly different from each other were grouped into the same region. **(e)** Box plot of axial  
586 distances of basal foot proteins in primary cilia from RPE-1 cells (n=40). RPGRIP1L was used to  
587 label the transition zone. Statistical analysis was done by one-way ANOVA with Tukey's multiple  
588 comparison test. **(f)** Top: linear maps representing protein polypeptide sequences showing the  
589 regions recognized by antibodies and the position of GFP insertion. Bottom: Box plot of radial  
590 distributions of CNTRL, CEP128, CEP170, NIN and ODF2 in primary cilia of RPE-1 cells using  
591 domain specific antibodies. Statistical analyses were conducted using Welch's t-test (for pair-wise  
592 comparisons) and Tukey's test (for multiple comparisons). Unless indicated otherwise, the  
593 differences are not significant. **(g)** Diagram showing proteins identified via BioID in close

594 proximity to CEP128-BirA\* in ciliated HEK-293 cells. Arrow thickness is proportional to the  
595 number of peptides detected. **(h)** 2D projection micrographs of 3D-SIM volume of a primary  
596 cilium in RPE-1 cell stained with anti-CEP112 (green) antibodies labelling middle domain (MD,  
597 left) and C-terminal domain (CTD, right), and anti-Glut-TUB (red) antibody, showing two distinct  
598 subpopulations of the protein: at the proximal ends of daughter centriole and at the basal feet (see  
599 arrows). Scale bars represent 1  $\mu\text{m}$ .

600

601

602

603

604

605

606

607

608

609

610

611

612

613

614

615

616

617

## Figure 2: The conserved and distinct architectural features of basal foot in motile cilia

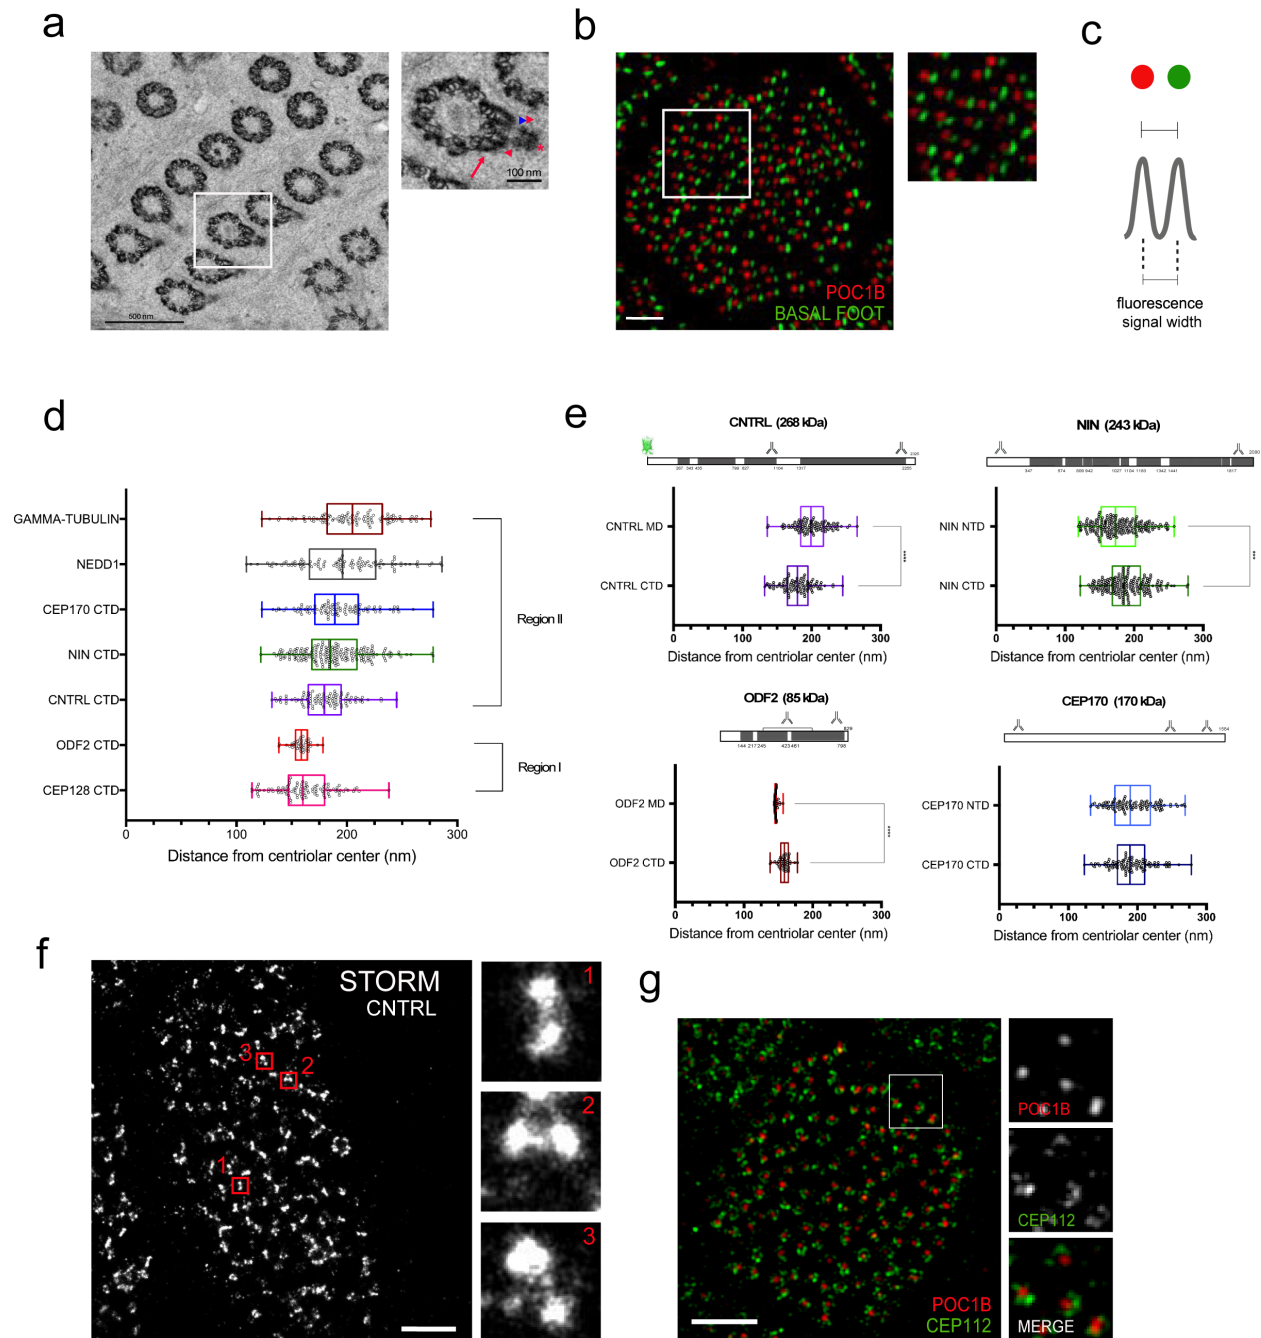

618

619

620

621

622 **Figure 2. The conserved and distinct architectural features of basal foot in motile cilia**

623 **(a)** Left: Representative TEM micrograph from a cross section of a human airway multiciliated  
624 cell. Scale bar represents 200 nm. Right: High-magnification view of the boxed area. Note three  
625 main electron-dense regions of the basal foot. Red asterisk denotes basal cap region, red  
626 arrowheads the spherical symmetrical structures, blue arrowhead the fibril region and red arrow  
627 the arch-region. Scale bar represents 100 nm. **(b)** Left: 2D projection micrograph of 3D-SIM  
628 volume of an airway epithelial multiciliated cell (end-on view) labeled with an antibody  
629 recognizing a basal body protein (POC1B, red) and a basal foot protein (CNTRL, green). Scale  
630 bar represents 1  $\mu\text{m}$ . Right: High-magnification view of boxed area. **(c)** Cartoon depiction of the  
631 strategy used to measure radial distance of basal foot proteins (green) in motile cilia of human  
632 airway multiciliated cells using end-on view. Radial distance was measured relative to the basal  
633 body center (red). **(d)** Box plot of radial distributions of basal foot proteins in human airway  
634 multiciliated cells (n=80). Region assignment was done based on one-way ANOVA with Tukey's  
635 multiple comparison test. Proteins whose distances were not significantly different were grouped  
636 into the same region. **(e)** Top: linear maps representing protein polypeptide sequences showing the  
637 regions recognized by antibodies. Bottom: Box plot of radial distributions of CNTRL, NIN, ODF2  
638 and CEP170 in motile cilia of human airway multiciliated cells using domain specific antibodies.  
639 (n=80). Statistical analyses were conducted using Welch's t-test for pair-wise comparisons. **(f)**  
640 Left: 2D-STORM micrograph of human airway multiciliated cells labeled with anti-CNTRL  
641 antibody. Scale bar represents 1  $\mu\text{m}$ . Right: High-magnification views of boxed areas. **(g)** 2D  
642 projection micrograph of 3D-SIM volume of an airway epithelial multiciliated cell (end-on view)  
643 labeled with an antibody recognizing a basal body protein (POC1B, red) and CEP112 CTD  
644 antibody. Scale bar represents 2  $\mu\text{m}$ .

645

### Figure 3. Super resolution mapping of basal foot reveals a novel type of cilia in airways multiciliated cells

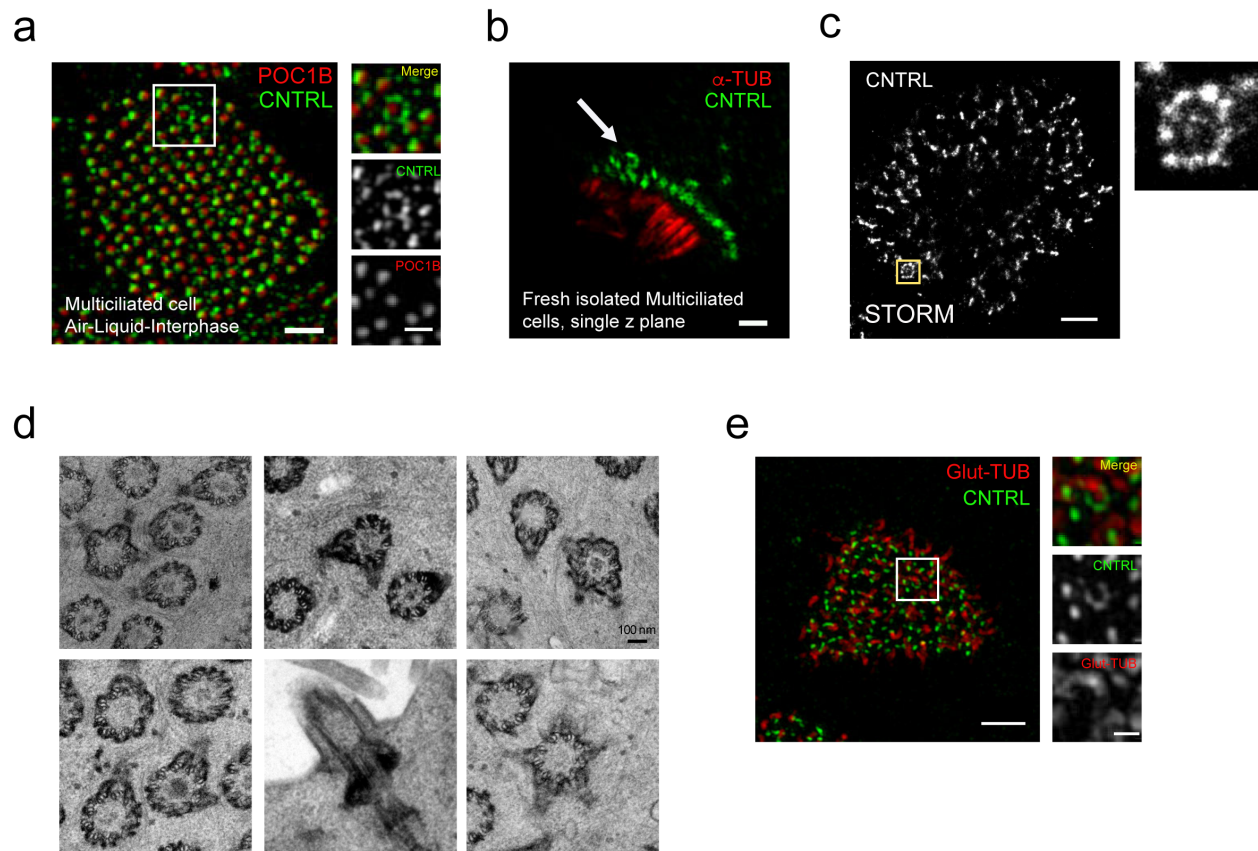

646

647

648

649

650

651

652

653

654

655

656 **Figure 3. Super-resolution mapping of basal foot reveals a novel type of cilia in airway**  
657 **multiciliated cells**

658 **(a)** Left: 2D projection micrograph of 3D-SIM volume of an airway multiciliated cell grown on  
659 Air-Liquid-Interface (ALI), labeled with anti-CNTRL (green) and anti-POC1B (red) antibodies.  
660 Note the ring-like pattern of CNTRL localization encircling the basal body labeled by POC1B.  
661 Right: High-magnification view of boxed area. Scale bars represent 1  $\mu\text{m}$  (left) and 500 nm (right).  
662 **(b)** 2D projection micrograph of 3D-SIM volume of human airway multiciliated cells freshly  
663 isolated from healthy individual, labeled with anti-CNTRL (green) and anti-alpha-tubulin (red)  
664 antibodies, showing the presence of the basal body with multiple basal feet. Scale bar represents 1  
665  $\mu\text{m}$ . **(c)** Left: 2D-STORM micrograph of airway multiciliated cell labeled with anti-CNTRL  
666 antibody, showing a distinct ring-like distribution of CNTRL. Right: High-magnification view of  
667 boxed area. Scale bars represent 1  $\mu\text{m}$ . **(d)** Collage of representative TEM micrographs showing  
668 basal bodies harboring multiple basal feet in human airway multiciliated cell. Scale bars represent  
669 100 nm. **(e)** Left: 2D projection micrographs of 3DSIM volume of an airway multiciliated cell  
670 labeled with anti-CNTRL (green) and anti-Glut-TUB (red) antibodies. Note the axoneme  
671 emanating from ring-like structure labeled with CNTRL. Right: High-magnification view of boxed  
672 area with individual channels. Scale bars represent 2  $\mu\text{m}$  (left) and 500 nm (right).

673

674

675

676

677

678

679

Figure 4. The novel cilium has hybrid features between primary and motile cilia

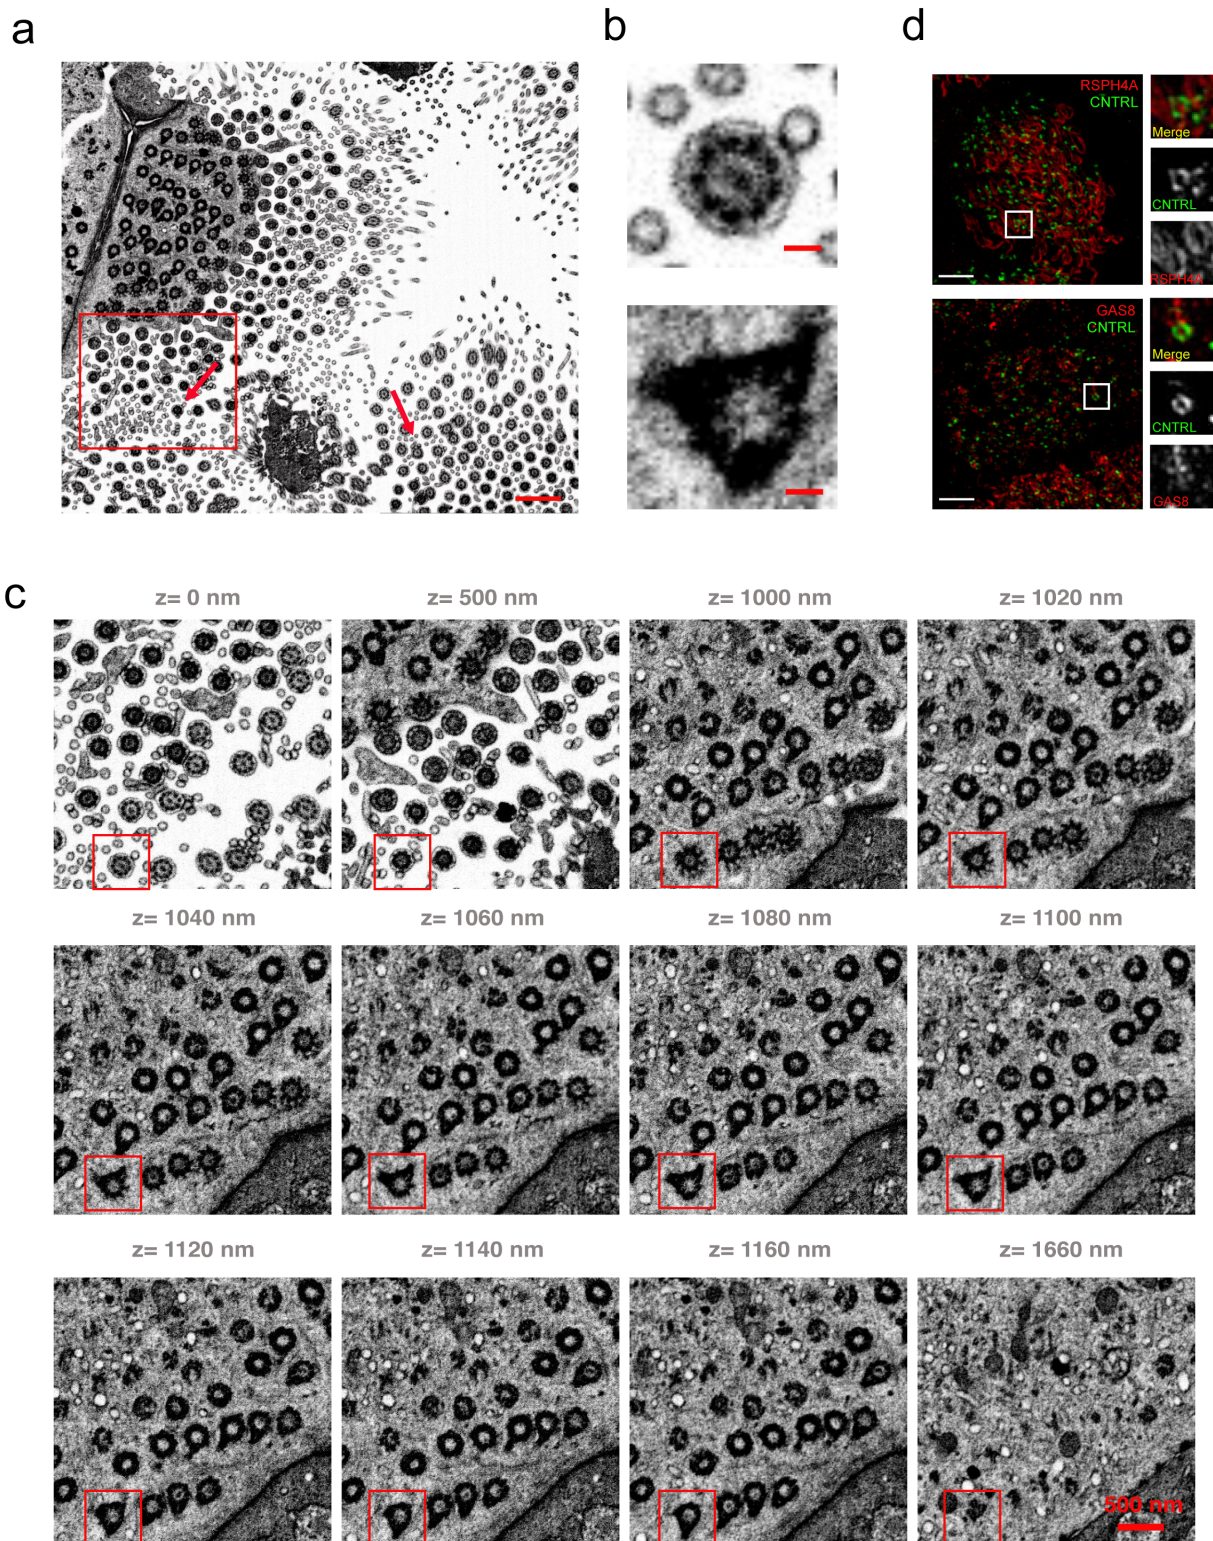



681 **Figure 4. The novel cilium has hybrid features between primary and motile cilia**

682 **(a)** Representative section from FIB-SEM tomogram of human multiciliated cells. Arrows indicate  
683 basal bodies with multiple basal feet. Scale bar represents 1  $\mu\text{m}$ . **(b)** High-magnification view of  
684 boxed area in (a) at different z position of the tomogram from  $z=0$  nm to  $z=1660$  nm. Note the  
685 hybrid cilium axoneme and central pair ( $z=0$  nm), transition fibers ( $z=1000$ - $1040$  nm), multiple  
686 basal feet ( $z=1160$ - $1160$  nm) and the absence of the endocytic pocket ( $z=1660$  nm). Scale bar  
687 represents 500 nm. **(c)** A high-magnification view of boxed area in (b) highlighting the basal body  
688 with a central pair and multiple basal feet. Scale bar represents 100 nm. **(d)** 2D projection  
689 micrographs of 3D-SIM volume of human airway multiciliated cells (left), and high-magnification  
690 views of boxed areas (right), labeled with anti-CNTRL (green), anti-RSPH4A (red, top) and anti-  
691 GAS8 (red, bottom) antibodies. Scale bars represent 2  $\mu\text{m}$ .

692

693

694

695

696

697

698

699

700

701

702

703

704

## Figure 5: Hybrid cilium is a conserved feature of multiciliated cells and originates from parental centrioles

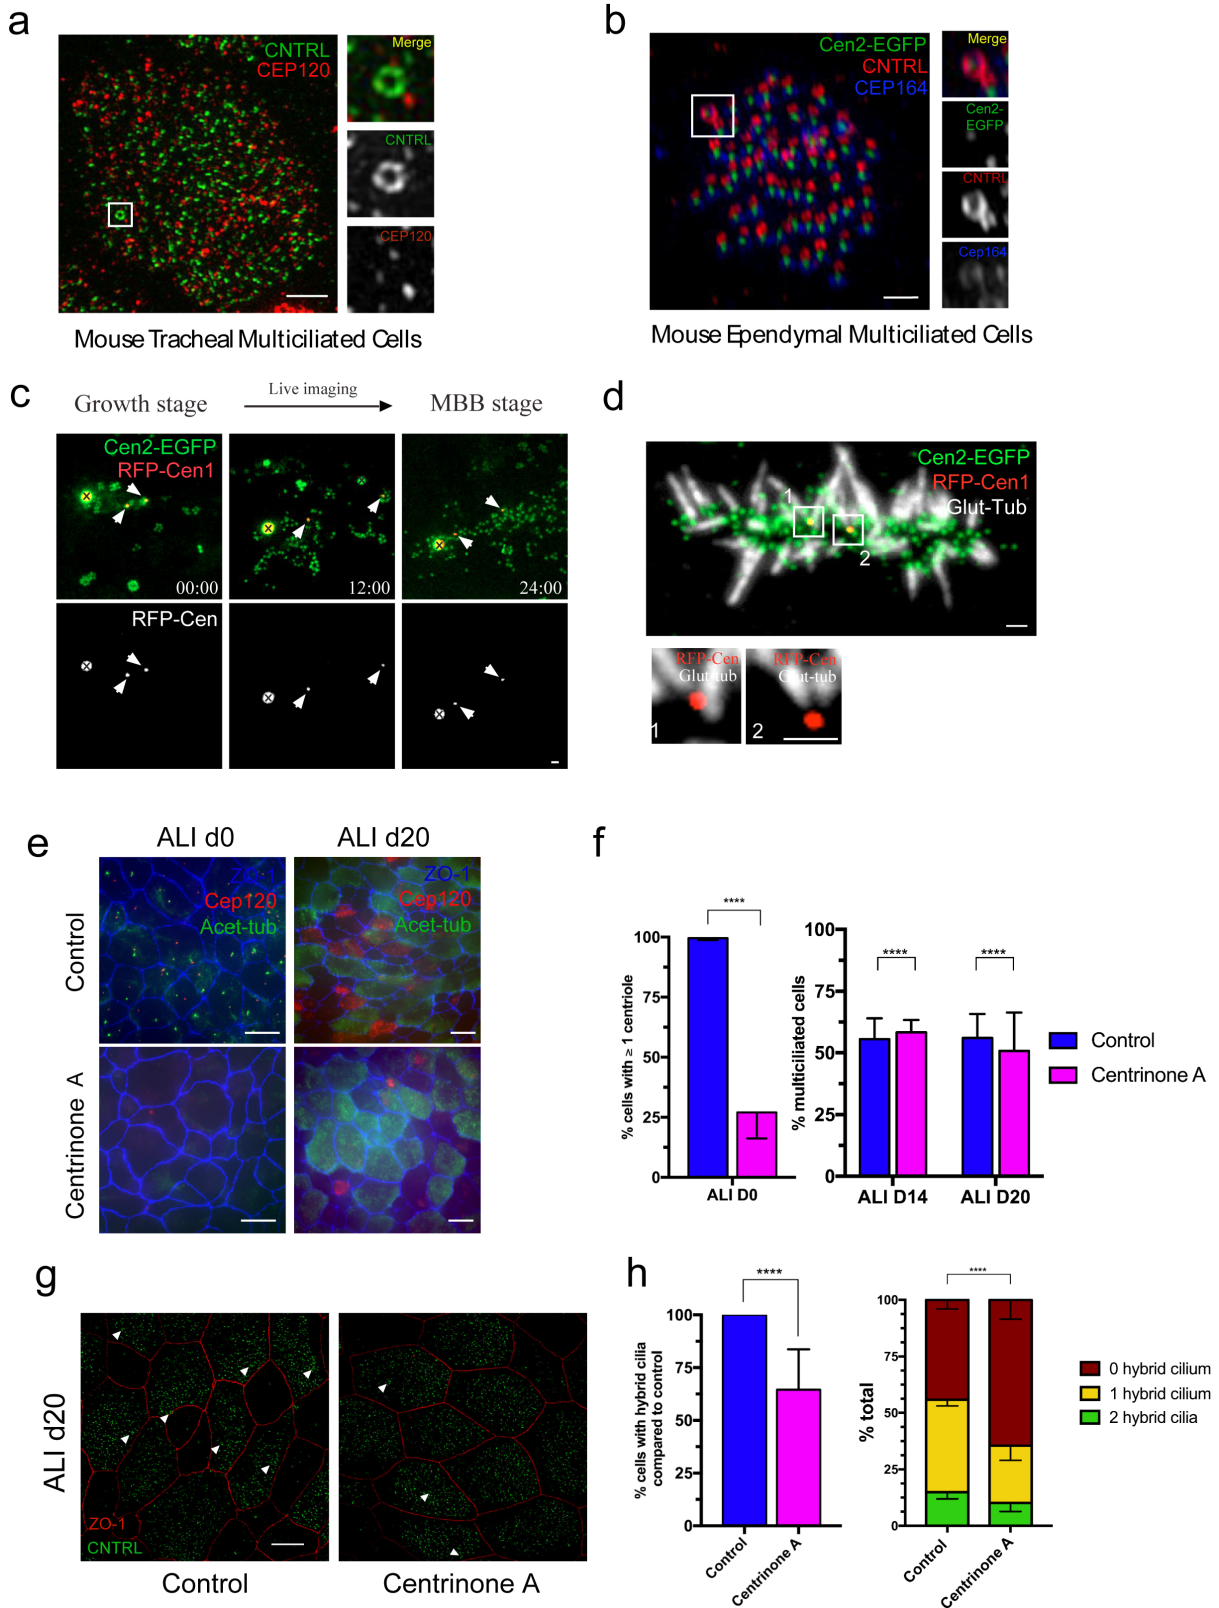

706 **Figure 5. Hybrid cilium is a conserved feature of multiciliated cells and originates from**  
707 **parental centrioles**

708 **(a)** Left: 2D projection micrograph of 3D-SIM volume of mouse tracheal multiciliated cell (ALI  
709 D20), labeled with anti-CNTRL (green) and anti-CEP120 (red) antibodies. Right: High-  
710 magnification view of boxed area with individual channels. Scale bar represents 2  $\mu\text{m}$ . **(b)** Left:  
711 2D projection micrograph of 3D-SIM volume of adult mouse ependymal multiciliated cells (P16),  
712 labeled with GFP-Centrin2, anti-CNTRL (red) and anti-CEP164 (blue) antibodies. Right: High-  
713 magnification view of boxed area labeled in left. Scale bar represents 1  $\mu\text{m}$ . **(c)** Live imaging of  
714 TagRFP-Cen1 centrosomal centrioles during centriole amplification in primary cultured  
715 ependymal progenitors from Cen2-EGFP mice. Newly formed EGFP+ procentrioles are growing  
716 from deuterosomes and RFP+ centrosomal centrioles (00:00) before disengaging from their  
717 growing platforms (12:00) and gathering all together in the basal body patch (24:00). Arrowheads  
718 point to RFP+ centrosomal centrioles. A «x» sign marks centrin aggregates. **(d)** 2D projection  
719 micrograph from immunostaining experiment of primary cultured ependymal multiciliated cells  
720 labeled with antibody labeling glutamylated-tubulin (GT335) and RFP+ centrosomal centrioles  
721 that are retained in the basal body patch. Note cilia growing from centrosomal centrioles **(e)** 2D  
722 projection fluorescence micrograph of volumes of mouse tracheal multiciliated cells at ALI D0  
723 (left) and ALI D20 (right), treated with DMSO control (top) or Centrinone A (bottom) and labeled  
724 with anti-acetylated tubulin (green), anti-CEP120 (red) and anti-ZO-1 (blue) antibodies. Scale bars  
725 represent 10  $\mu\text{m}$ . **(f)** Bar graph showing percentage of cells with more than one centrioles at ALI  
726 D0 (left) and percentage of multiciliated cells at ALI D14 and D20 (right) in DMSO control (blue)  
727 or Centrinone A (pink);  $n > 6000$ . Statistical analysis was done using Cochran-Mantel-Haenszel  
728 test. **(g)** 2D projection micrograph of 3D-SIM volume of mouse tracheal multiciliated cells at ALI  
729 D20 treated with DMSO control (left) or Centrinone A (right), labeled with anti-CNTRL (green)

730 antibody. Arrowheads indicate CNTRL rings. Scale bar represents 5  $\mu\text{m}$ . **(h)** Left: Bar graph  
731 representing percentage of cells with hybrid cilium in DMSO control (blue) and Centrinone A-  
732 treated (pink) cells, normalized to control condition;  $n > 800$ . Statistical analysis was done using  
733 Cochran-Mantel-Haenszel test. Right: Bar graph representing percentage of cells with none (red),  
734 one (yellow) or two (green) hybrid cilia in ALI D20 mouse tracheal multiciliated cells treated with  
735 DMSO control (left) or Centrinone A (right);  $n > 800$ .

736

737

738

739

740

741

742

743

744

745

746

747

748

749

750

751

752

753

## Figure 6. Hybrid Cilium is a signalling centre whose position is dependent on flow

a

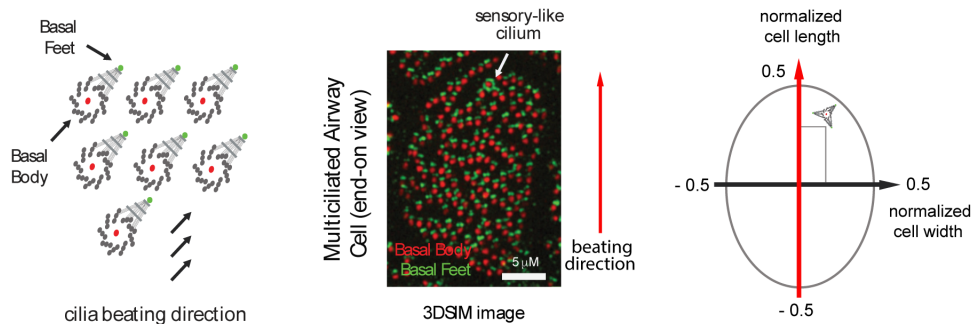

b

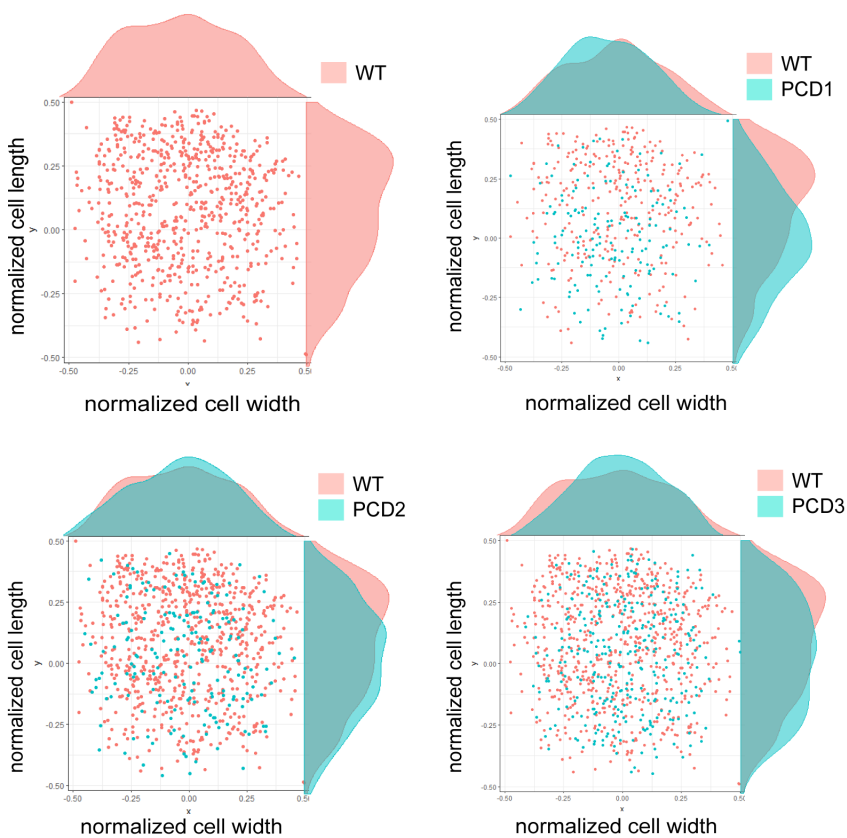

c

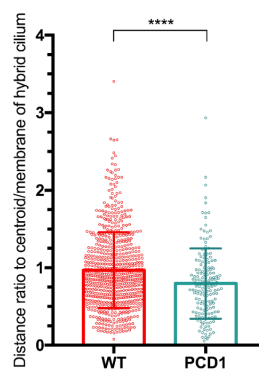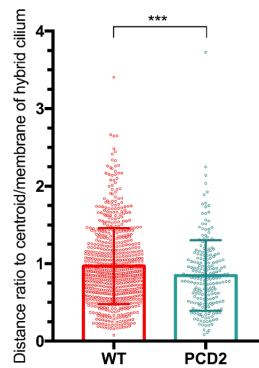

d

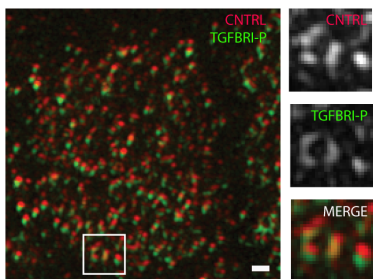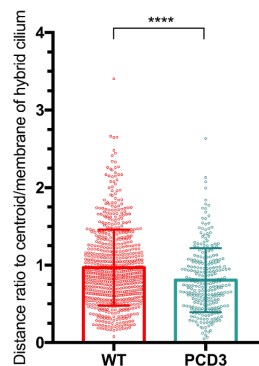

755 **Figure 6. Hybrid cilium is a signaling centre whose position is dependent on flow**

756 **(a)** Left: Cartoon depiction of the strategy for analysis of the position of the hybrid cilium. The  
757 position is calculated relative to coordinates ( $-0.5 < x < +0.5$ ) obtained by normalizing the cell length  
758 and width to 1. Cell length is assigned as parallel to the direction of ciliary beating measured by  
759 rotational polarity of basal bodies-basal feet pairs, cell width is assigned as perpendicular to the  
760 direction of ciliary beating. Right: MATLAB-based analysis to assess rotational polarity in  
761 multiciliated cells. **(b)** Scatterplot showing the cumulative distribution of hybrid cilia along  
762 normalized cell width and cell length in human airway multiciliated cells from healthy individuals,  
763 indicating a positional bias toward the direction of ciliary beating. Each dot represents a hybrid  
764 cilium in a cell; n=694. **(c)** Scatterplot-bar graphs showing distribution of ratio of hybrid cilium-  
765 cell centroid distance to hybrid cilium-cell membrane shortest distance of human airway  
766 multiciliated cells from healthy individuals (red, n=687) or PCD patients (PCD1-3) with immotile  
767 cilia caused by loss-of-function mutations in DNAH5 and DNAH11 (blue, n>180). Each dot  
768 represents the position of a hybrid cilium in a cell. Statistical analysis was done using Welch's t-  
769 test. **(d)** Left: 2D projection micrograph of 3D-SIM volume of human ALI multiciliated cell treated  
770 with TGF $\beta$ 1 ligand (20ng/ml; 30 min), labeled with anti-phospho-TGFBRI (green) and anti-  
771 CNTRL (red) antibodies. Right: High-magnification view of boxed area with individual channels.  
772 Scale bar represents 500 nm.

773

774 **Acknowledgements**

775 This project is funded by CIHR program grant # 391917 to VM and SD; National Heart, Lung and  
776 Blood Institute (R01-HL128370) and National Institutes of Diabetes and Digestive and Kidney  
777 Diseases (R01-DK108005) to MRM; Z.L. was supported by the SickKids Restrcomp Fellowship;  
778 The authors acknowledge PCD patients and volunteers for providing nasal cells for this study,

779 Julie Avolio for help with nasal cell scraping. Jia Zhou, Cindy Fang, Alexandra Albulescu and  
780 Jasmine Kang assisted in data analysis. Douglas Holmyard (EM facility, The Hospital for Sick  
781 Children) prepared TEM and FIB-SEM samples and helped set up EM imaging. McGill EM  
782 facility for FIB-SEM acquisition. We thank Profs Bornens, Pelletier, Cheeseman, Kyung Lee,  
783 Elsasser, Avidor-Reiss for generously sharing antibodies and plasmids.

784

### 785 **Author Contributions**

786 Q.P.H.N. designed and conducted experiments, collected and analyzed the data, wrote the  
787 manuscript. Z.L. wrote MATLAB scripts and did STORM experiments. L.Z., H.O., W.F. and T.M.  
788 helped with airway multiciliated cells culturing system; RN performed the mouse tracheal epithelia  
789 cell experiments; MM and VM conceived and designed the MTEC-centrinone experiments; N.D.,  
790 M.A and A.M. conceived and performed the ependymal cells pulse chase experiments; E.C., E.L.  
791 and B.R. performed BioID experiments; S.D. provided PCD patients cells, K.C. helped with  
792 sample preparation for FIB-SEM data collection and acquired data; V.M. conceived the project,  
793 designed experiments, collected data, analyzed data and wrote the manuscript.

794

### 795 **Competing Financial Interests**

796 The authors declare no competing financial interests.

### 797 **References**

798

1. Reiter, J. & Leroux, M. Genes and molecular pathways underpinning ciliopathies. *Nat. Rev. Mol. Cell Biol.* **18**, 533 (2017).

2. Fliegauf, M., Benzing, T. & Omran, H. When cilia go bad: cilia defects and ciliopathies. *Nat. Rev. Mol. Cell Biol.* **8**, 880 (2007).
3. Clare, D. K. et al. Basal foot MTOC organizes pillar MTs required for coordination of beating cilia. *Nat Commun.* **5** (2014).
- 4.. Kunitomo, K. et al. Coordinated Ciliary Beating Requires Odf2-Mediated Polarization of Basal Bodies via Basal Feet. *Cell* **148**, 189-200 (2012).
5. Tateishi, K. et al. Two appendages homologous between basal bodies and centrioles are formed using distinct Odf2 domains. *J. Cell Biol.* **203**, 417 (2013).
6. Spassky, N. & Meunier, A. The development and functions of multiciliated epithelia. *Nat. Rev. Mol. Cell Biol.* **18**, 423 (2017).
7. Jain, R. et al. Temporal Relationship between Primary and Motile Ciliogenesis in Airway Epithelial Cells. *Am. J. Respir. Cell Mol. Biol.* **43**, 731-739 (2010).
8. Boisvieux-Ulrich, E., Sandoz, D. & Allart, J. P. Determination of ciliary polarity precedes differentiation in the epithelial cells of quail oviduct. *Biol. Cell* **72**, 3-14 (1991).
9. Frisch, D. & Farbman, A. I. Development of order during ciliogenesis. *Anat. Rec.* **162**, 221-231 (1968).
10. Vladar, E., Antic, D. & Axelrod, J. Planar Cell Polarity Signaling: The Developing Cell's Compass. *CSH PERSPECT BIOL* **1**, a002964 (2009).
11. Vladar, E., Bayly, R. D., Sangoram, A. M., Scott, M. P. & Axelrod, J. D. Microtubules Enable the Planar Cell Polarity of Airway Cilia. *Curr. Biol.* **22**, 2203-2212 (2012).
12. Herawati, E et al. Multiciliated cell basal bodies align in stereotypical patterns coordinated by the apical cytoskeleton. *J Cell Biol.* **214**, 571-586 (2016).



13. Luo, W et al. Cilia distribution and polarity in the epithelial lining of the mouse middle ear cavity *Sci. Rep.* **7** (2017).
14. Zariwala, M. A., Knowles, M. R. & Omran, H. Genetic defects in ciliary structure and function. *Annu. Rev. Physiol.* **69**, 423-450 (2007).
15. Shapiro, A. J et al. Diagnosis, monitoring, and treatment of primary ciliary dyskinesia: PCD foundation consensus recommendations based on state of the art review *Pediatr Pulmonol.* **51**, 115-132 (2015).
16. Knowles, M. R, Daniels, L. A., Davis, S. D, Zariwala, M. A. & Leigh, M. W. Primary Ciliary Dyskinesia. Recent Advances in Diagnostics, Genetics, and Characterization of Clinical Disease. *Am J Respir Crit Care Med.* **188**, 913–922 (2013).
17. Mazo, G., Soplop, N., Wang, W-J., Uryu K. & Tsou, M-F. B. Spatial Control of Primary Ciliogenesis by Subdistal Appendages Alters Sensation-Associated Properties of Cilia *Dev. Cell* **39**, 424-437 (2016).
18. Galati, D. F., Mitchell, B. J. & Pearson, C. G. Subdistal appendages stabilize the ups and downs of ciliary life. *Dev. Cell* **39**, 387-389 (2016).
19. Graser, S. et al. Cep164, a novel centriole appendage protein required for primary cilium formation. *J Cell Biol.* **79**, 321-330 (2007).
20. Hoey, D. A., Downs, M. E. & Jacobs, C. R. The mechanics of the primary cilium: an intricate structure with complex function. *J Biomech* **45**, 17-26 (2012).
21. Sorokin, S. P. Reconstructions of centriole formation and ciliogenesis in mammalian lungs. *J. Cell Sci.* **3**, 207-230 (1968).
22. Winey, M. & O'Toole, E. Centriole structure. *Phil. Trans. R. Soc. B.* **369**, 20130457 (2014).

23. Uzbekov, R. & Alieva, I. Who are you, subdistal appendages of centriole? *Open Biol.* **8**, 180062 (2018).
24. Paintrand, M., Moudjou, M., Delacroix, H. & Bornens, M. Centrosome organization and centriole architecture: their sensitivity to divalent cations. *J. Struct. Biol.* **8**, 107-128 (1992).
25. Albrecht-Buehler, G. & Bushnell, A. The ultrastructure of primary cilia in quiescent 3T3 cells. *Exp. Cell Res.* **126**, 427-37 (1980).
26. Mogensen, M. M., Malik, A., Piel, M., Bouckson-Castaing, V. & Bornens, M. Microtubule minus-end anchorage at centrosomal and non-centrosomal sites: the role of ninein. *J. Cell Sci.* **113**, 3013-3023 (2000).
27. Nakagawa, Y., Yamane, T., Okanou, T., Tsukita, S. & Tsukita, S. Outer dense fiber 2 is a widespread centrosome scaffold component preferentially associated with mother centrioles: its identification from isolated centrosomes. *Mol. Biol. Cell* **12**, 1687-1697 (2001).
28. Ishikawa, H., Kubo, A., Tsukita, S. & Tsukita, S. Odf2-deficient mother centrioles lack distal/subdistal appendages and the ability to generate primary cilia. *Nat. Cell Biol.* **7**, 517-524 (2005).
29. Veleri, S. et al. Ciliopathy-associated gene *Cc2d2a* promotes assembly of subdistal appendages on the mother centriole during cilia biogenesis. *Nat. Commun.* **5** (2014).
30. Guarguaglini, G. et al. The forkhead-associated domain protein Cep170 interacts with Polo-like kinase 1 and serves as a marker for mature centrioles. *Mol. Biol. Cell* **6**, 1095-1107 (2005).

31. Chang, P., Giddings, T. H., Winey, M. & Stearns, T.  $\epsilon$ -Tubulin is required for centriole duplication and microtubule organization. *Nat. Cell Biol.* **5**, 71-76 (2003).
32. Gromley, A. et al. A novel human protein of the maternal centriole is required for the final stages of cytokinesis and entry into S phase. *J. Cell Biol.* **161**, 535-545 (2003).
33. Ibi, M. et al. Trichoplein controls microtubule anchoring at the centrosome by binding to Odf2 and ninein. *J. Cell Sci.* **124**, 857-864 (2011).
34. Gupta, G. D. et al. A dynamic protein interaction landscape of the human centrosome-cilium interface. *Cell* **163**, 1484-1499 (2015).
35. Huang, N. et al. Hierarchical assembly of centriole subdistal appendages via centrosome binding proteins CCDC120 and CCDC68. *Nat. Commun.* **8**, 15057 (2017).
36. Tateishi, K., Nishida, T., Inoue, K. & Tsukita, S. Three-dimensional Organization of Layered Apical Cytoskeletal Networks Associated with Mouse Airway Tissue Development. *Sci. Rep.* **7**, 43783 (2017).
37. Hehnly, H., Chen, C-T., Powers, C. M., Liu, H-L. & Doxsey, S. The centrosome regulates the Rab11-dependent recycling endosome pathway at appendages of the mother centriole. *Curr. Biol.* **22**, 1944-1950 (2012).
38. Delgehyr, N., Sillibourne, J. & Bornens, M. Microtubule nucleation and anchoring at the centrosome are independent processes linked by ninein function. *J Cell Sci.* **118**, 1565-1575 (2005).
39. Welburn J. P. I. & Cheeseman, I. M. The microtubule-binding protein Cep170 promotes the targeting of the kinesin-13 depolymerase Kif2b to the mitotic spindle. *Mol. Biol. Cel.* **23**, 4786-4795 (2012).

40. Lamla, S. & Nigg, E. A. Functional Characterisation of the Centrosomal Protein Cep170. Doctoral Thesis (2009).
41. Gustafsson, M. G. L. Surpassing the lateral resolution limit by a factor of two using structured illumination microscopy. *J. Microsc.* **198**, 82-87 (2000).
42. Sydor, A. M., Czymmek, K. J., Puchner, E. M. & Mennella, V. Super-Resolution Microscopy: From Single Molecules to Supramolecular Assemblies. *Trends Cell Biol.* **25**, 730-48 (2015).
43. Schermelleh, L. et al. Subdiffraction Multicolor Imaging of the Nuclear Periphery with 3D Structured Illumination Microscopy. *Science* **320**, 1332–1336 (2008).
44. Ou, Y. Y., Mack, G. J., Zhang, M. & Rattner, J. B. CEP110 and ninein are located in a specific domain of the centrosome associated with centrosome maturation. *J. Cell Sci.* **115**, 825-1835 (2002).
45. Anderson, R. G. The three-dimensional structure of the basal body from the rhesus monkey oviduct. *J. Cell Biol.* **54**, 246-265 (1972).
46. Shi, X. et al. Super-resolution microscopy reveals that disruption of ciliary transition-zone architecture causes Joubert syndrome. *Nat. Cell Biol.* **19**, 1178 (2017).
47. Mennella, V. et al. Subdiffraction-resolution fluorescence microscopy reveals a domain of the centrosome critical for pericentriolar material organization. *Nat. Cell Biol.* **14**, 1159, (2012).
48. Mennella, V., Agard, A. D., Huang, B. & Pelletier, L. Amorphous no more: subdiffraction view of the pericentriolar material architecture. *Trends Cell Biol.* **24**, 188-194 (2014).

49. Lawo, S., Hasegan, M., Gupta, G. D., Pelletier, L. Subdiffraction Imaging of Centrosomes Reveals Higher-Order Organizational Features of Pericentriolar Material. *Nat. Cell Biol.* **14**, 1148-1158 (2012).
50. Jakobsen, L. et al. Novel asymmetrically localizing components of human centrosomes identified by complementary proteomics methods. *EMBO J.* **30**, 1520-1535 (2011).
51. Venoux, M. et al. Poc1A and Poc1B act together in human cells to ensure centriole integrity. *J. Cell Sci.* **126**, 163–175 (2013).
52. Sydor, A. M. et al. PPP1R35 is a novel centrosomal protein that regulates centriole length in concert with the microcephaly protein RTTN. *Elife* **7**, e37846 (2016).
53. Kollman, J. M., Merdes, A., Mourey, L. & Agard, D. A. Microtubule nucleation by  $\gamma$ -tubulin complexes. *Nat. Rev. Mol. Cell Biol.* **12**, 709-21 (2011).
54. Lüders, J., Patel, U. K., & Stearns, T. GCP-WD is a gamma-tubulin targeting factor required for centrosomal and chromatin-mediated microtubule nucleation. *Nat. Cell Biol.* **8**, 137-47 (2006).
55. McAuley, J. R. & Anand, V. K. Clinical significance of compound cilia. *Otolaryngol Head Neck Surg.* **118**, 685-7 (1998).
56. Olbrich, H. et al. Loss-of-function GAS8 mutations cause primary ciliary dyskinesia and disrupt the nexin-dynein regulatory complex. *Am J Hum Genet* **94**, 546-554 (2015).
57. Frommer, A. et al. Immunofluorescence Analysis and Diagnosis of Primary Ciliary Dyskinesia with Radial Spoke Defects. *A.m J. Respir. Cell Mol. Biol.* **53**, 563-73 (2015).
58. Al Jord, A., Lemaître, A-I., Delgehyr, N., Faucourt, M. & Spassky, N. Centriole amplification by mother and daughter centrioles differs in multiciliated cells. *Nature* **516**, 104 (2014).

59. Vladar, E. K. & Stearns, T. Molecular characterization of centriole assembly in ciliated epithelial cells. *J. Cell Biol.* **178**, 31-42 (2007).
60. Zhao, H. et al. The Cep63 paralogue Deup1 enables massive de novo centriole biogenesis for vertebrate multiciliogenesis. *Nat. Cell Biol.* **15**, 1434 (2013).
61. Higginbotham, H., Bielas, S., Tanaka, T. & Gleeson J. G. Transgenic mouse line with green-fluorescent protein-labeled Centrin 2 allows visualization of the centrosome in living cells. *Transgenic Res.* **13**, 155-64 (2004).
62. Wong, Y. L. et al. Reversible centriole depletion with an inhibitor of Polo-like kinase 4. *Science* **348**, 1155–1160 (2015).
63. Mitchell, B., Jacobs, R., Li, J., Chien, S. & Kintner, C. A positive feedback mechanism governs the polarity and motion of motile cilia. *Nature* **447**, 97-101 (2007).
64. Brooks, E. R. & Wallingford, J. B. Multiciliated Cells. *Curr. Biol.* **24**, R973-R982 (2014).
65. Guirao, B. et al. Coupling between hydrodynamic forces and planar cell polarity orients mammalian motile cilia. *Nat. Cell Biol.* **12**, 341 (2010).
66. Shin, J-B. et al. Xenopus TRPN1 (NOMPC) localizes to microtubule-based cilia in epithelial cells, including inner-ear hair cells. *Proc. Natl. Acad. Sci. USA.* **102**, 12572-12577 (2005).
67. Riedel-Kruse, I. H., Hilfinger, A., Howard, J. & Jülicher, F. How molecular motors shape the flagellar beat. *HFSP J.* **1**, 192-208 (2007).
68. Biggart, E., Pritchard, K., Wilson, R., & Bush, A. Primary ciliary dyskinesia syndrome associated with abnormal ciliary orientation in infants. *Eur. Respir. J.* **17**, 444-448 (2001).
69. Jorissen, M. & Willems, T. The secondary nature of ciliary (dis)orientation in secondary and primary ciliary dyskinesia. *Acta. Oto-Laryngologica.* **124**, 527-31 (2004)

70. Rautiainen, M., Collan, Y., Nuutinen, J. & Afzelius, B.A. Ciliary orientation in the "immotile cilia" syndrome. *Eur. Arch. Otorhinolaryngol.* **247**, 100-103 (1990).
71. Mönnich, M. et al. Mother Centriole and Regulates TGF- $\beta$ /BMP Signaling at the Primary Cilium," *Cell Rep.* **22**, 2584-2592 (2018).
72. Wojciech, S. et al. The orphan GPR50 receptor promotes constitutive TGF $\beta$  receptor signaling and protects against cancer development. *Nat. Commun.* **9**, 1216 (2018).
73. Silva, M. T., Wensing, L. A., Brum, P. C., Câmara, N. O., Miyabara, E. H. Impaired structural and functional regeneration of skeletal muscles from  $\beta$ 2-adrenoceptor knockout mice. *Acta. Physiol. (Oxf)* **211**, 617-33 (2014).
74. Donkor, F. F., Mönnich, M., Czirr, E., Hollemann, T. & Hoyer-Fender, S. Outer dense fibre protein 2 (ODF2) is a self-interacting centrosomal protein with affinity for microtubules. *J. Cell Sci.* **117**, 4643-4651 (2004).
75. Chih, B. et al., A ciliopathy complex at the transition zone protects the cilia as a privileged membrane domain. *Nat. Cell Biol.* **14**, 61 (2012).
76. Garcia-Gonzalo, F. R. et al. A transition zone complex regulates mammalian ciliogenesis and ciliary membrane composition. *Nat. Genet.* **43**, 776 (2011).
77. Kanie, T. et al. The CEP19-RABL2 GTPase Complex Binds IFT-B to Initiate Intraflagellar Transport at the Ciliary Base. *Dev. Cell*, **42**, 22-36 (2017).
78. Mojarad, B. A. et al. CEP19 cooperates with FOP and CEP350 to drive early steps in the ciliogenesis programme. *Open Biol.* **7**, 170114 (2017).
79. Nishijimaa, Y. et al. RABL2 interacts with the intraflagellar transport-B complex and CEP19 and participates in ciliary assembly. *Mol. Biol. Cell* **28**, 1652-1666 (2017).

80. Lu, C. J. et al. Non-random distribution and sensory functions of primary cilia in vascular smooth muscle cells. *Kidney Blood Press. Res.* **31**, 171-184 (2008).
81. Wu, J. et al. Characterization of Primary Cilia in Human Airway Smooth Muscle Cells. *Chest* **136**, 561-570 (2009).
82. Shah, A. S., Ben-Shahar, Y., Moninger, T. O., Kline, J. N. & Welsh, M. J. Motile Cilia of Human Airway Epithelia Are Chemosensory. *Science* **325**, 1131-1134 (2009).
83. Teilmann, S. et al. Localization of transient receptor potential ion channels in primary and motile cilia of the female murine reproductive organs. *Mol. Reprod. Dev.* **71**, 444-52 (2005).
84. Carvalho-Santos, Z., Azimzadeh, J., Pereira-Leal, J. B. & Bettencourt-Dias, M. Tracing the origins of centrioles, cilia, and flagella. *J Cell Biol.* **194**, 165-175 (2011).
85. Bloodgood, R. A. Sensory reception is an attribute of both primary cilia and motile cilia. *J Cell Sci.* **123**, 505-509 (2010).
86. Budi, E. H., Duan, D. & Derynck, R. Transforming Growth Factor- $\beta$  Receptors and Smads: Regulatory Complexity and Functional Versatility. *Trends Cell Biol.* **27**, 658-672 (2017).
87. Clement, C. A. et al. TGF- $\beta$  signaling is associated with endocytosis at the pocket region of the primary cilium. *Cell Rep.* **3**, 1806-14 (2013) .
88. Tözser, J. et al. TGF- $\beta$  signaling regulates the differentiation of motile cilia. *Cell Rep.* **11**, 1000-1007 (2015).
89. Narayan, K. et al. Multi-resolution correlative focused ion beam scanning electron microscopy: applications to cell biology. *J. Struct Biol.* **185**, 278-284 (2014).



90. Coyaud, E. et al. BioID-based Identification of Skp Cullin F-box (SCF) $\beta$ -TrCP1/2 E3 Ligase Substrates. *Mol. Cell Proteomics* **14**, 1781-95 (2015).
91. Mahjoub, M. R., Xie, Z. & Stearns, T. Cep120 is asymmetrically localized to the daughter centriole and is essential for centriole assembly. *J. Cell Biol.* **191**, 331–346 (2010).
92. You, Y., Richer, E. J., Huang, T. & Brody, S. L. Growth and differentiation of mouse tracheal epithelial cells: selection of a proliferative population. *Am. J. Physiol. Lung Cell Mol Physiol.* **283**, L1315-21 (2002).

799  
800  
801  
802  
803  
804  
805  
806  
807  
808  
809  
810  
811  
812  
813  
814  
815  
816  
817  
818  
819  
820  
821  
822  
823  
824  
825  
826  
827  
828  
829  
830  
831  
832

833 **Supplemental Tables**

834

835

836 **Table S1:** Radial and axial distance measurements of basal foot proteins in primary cilia (n=40)

837

838

| Protein    | Radial distance (nm) | Axial distance (nm) |
|------------|----------------------|---------------------|
| Glut-TUB   | 87±5                 | N/A                 |
| TCHP       | 269±30               | 262±52              |
| ODF2 CTD   | 155±16               | 214±41              |
| ODF2 MD    | 143±16               | 209±45              |
| CEP128 CTD | 139±15               | 239±70              |
| GFP-CEP128 | 203±16               | 245±40              |
| CEP19      | 162±15               | 284±56              |
| CNTRL CTD  | 153±18               | 258±41              |
| CNTRL MD   | 205±22               | 248±52              |
| GFP-CNTRL  | 240±19               | 224±51              |
| NIN CTD    | 248±16               | 226±51              |
| NIN NTD    | 253±25               | 238±32              |
| CEP170 CTD | 237±25               | 230±62              |
| CEP170 MD  | 231±22               | 243±58              |
| CEP170 NTD | 244±22               | N/A                 |
| CC2D2A     | 198±20               | 333±44              |
| GAL-3      | 185±36               | N/A                 |

839

840

841

842

843

844

845

846

847

848

849

850

851

852

853

854

855

856

857

858

859 **Table S2:** Radial distance measurements of GFP-NIN constructs in ciliated RPE cells (n>23)

860  
861

| NIN constructs | radial distance (nm) |
|----------------|----------------------|
| GFP-NIN        | 245±25               |
| GFP-aa197      | 218±32               |
| GFP-aa764      | 213±32               |
| GFP-aa1640     | 213±36               |
| GFP-aa1647     | 201±32               |

862  
863  
864  
865  
866  
867

**Table S3:** Radial distance measurements of subdistal appendage proteins in cycling cells (n=40)

| protein    | radial distance (nm) |
|------------|----------------------|
| ODF2 CTD   | 137±16               |
| CEP128 CTD | 144±16               |
| CNTRL CTD  | 171±16               |
| NIN CTD    | 245±18               |
| NIN NTD    | 243±25               |
| CEP170 CTD | 231±20               |
| CEP170 MD  | 249±21               |

868  
869  
870  
871  
872

**Table S4:** Radial distance measurements of basal foot proteins in motile cilia (n=80)

| protein    | radius distance (nm) |
|------------|----------------------|
| ODF2 CTD   | 158±16               |
| ODF2 MD    | 147±5                |
| CEP128 CTD | 162±25               |
| CEP19      | 177±22               |
| CNTRL CTD  | 180±23               |
| CNTRL MD   | 200±224              |
| NIN CTD    | 188±29               |
| NIN NTD    | 177±32               |
| CEP170 CTD | 191±30               |
| CEP170 NTD | 194±33               |
| NEDD1      | 197±41               |
| Gamma-tub  | 206±33               |

873

874 **Table S5:** PCD patients genotype

875  
876

| Name | Gene          | Mutation(s)                   |
|------|---------------|-------------------------------|
| PCD1 | <i>DNAH5</i>  | c.[1432>T]; c[11571-iG>A]     |
| PCD2 | <i>DNAH11</i> | p.[(Cys4286*)];[(Ile4122Ser)] |
| PCD3 | <i>DNHA5</i>  | Hom p.[(Phe634Serfs*2)]       |

877  
878  
879  
880  
881  
882  
883

**Table S6:** List of plasmid and primers used in this study

| Gene insert | Vector backbone                           | Final plasmid                     | Primer sequences used (5'-3')                                                                                                                                                                              |
|-------------|-------------------------------------------|-----------------------------------|------------------------------------------------------------------------------------------------------------------------------------------------------------------------------------------------------------|
| <i>NIN</i>  | Sept2 promoter-FRT puro endo GFP-His-Flag | NTD GFP-NIN<br>(Gibson Assembly)  | <u>NIN:</u><br>FOR: 5'-atatcggatccgaattcATGGACGAGGTGGAACAG-3'<br>REV: 5'-ggtggatccctcgagCTAAGATCTCAGTGGGGG-3'<br><u>pcDNA FRT TO:</u><br>FOR: 5'-CTCGAGGGATCCACCGGA-3'<br>REV: 5'-GAATTCGGATCCGATATCAGC-3' |
|             |                                           | AfeI GFP-NIN<br>(aa1647)          | FOR: 5'-TCAGAGCGCTCCATGGTGAGCAAGGGCGAG-3'<br>REV: 5'-CTGAAGCGCTCCTTGTACAGCTCGTCCATGC-3'                                                                                                                    |
|             |                                           | HindIII GFP-NIN<br>(aa1460)       | FOR: 5'-TCAGAAGCTTATGGTGAGCAAGGGCGAG-3'<br>REV: 5'-CTGAAAGCTTCTTGTACAGCTCGTCCATGC-3'                                                                                                                       |
|             |                                           | XmaI GFP-NIN<br>(aa197)           | FOR: 5'-TCAGCCCGGGTTATGGTGAGCAAGGGCGAG-3'<br>REV: 5'-CTGACCCGGGACTTGTACAGCTCGTCCATGC-3'                                                                                                                    |
|             |                                           | XmnI GFP-NIN<br>(aa764)           | FOR: 5'-TCAGGAACAGTTTCTTATGGTGAGCAAGGGCGAG-3'<br>REV: 5'-CTGAGAAACTGTTCCCTTGTACAGCTCGTCCATGC-3'                                                                                                            |
|             |                                           | GFP-NIN with stop codon after GFP | FOR: 5'-GACGAGCTGTACAAGTAATCCGGA CT CAGATCTG-3'<br>REV: 5'-CAGATCTGAGTCCGGATTACTTGTACAGCTCGTC-3'                                                                                                           |

|               |                                           |                                 |                                                                                                                                                                                                                                                          |
|---------------|-------------------------------------------|---------------------------------|----------------------------------------------------------------------------------------------------------------------------------------------------------------------------------------------------------------------------------------------------------|
| <i>CNTRL</i>  | Sept2 promoter-FRT puro endo GFP-His-Flag | NTD GFP-CNTRL (Gibson assembly) | <p><u>CNTRL:</u></p> <p>FOR:<br/>5' atatcgatccgaattcATGAAGAAAGGTTCTCAACAAAAAATATTC-3'</p> <p>REV:<br/>5'-ggtggatccctcgagTCATCTGGCTGAGGCATTC-3'</p> <p><u>pcDNA_FRT_TO:</u></p> <p>FOR: 5'-CTCGAGGGATCCACCGGA-3'<br/>REV: 5'-GAATTCGGATCCGATATCAGC-3'</p> |
| <i>CEP128</i> | CMV promoter-pcDNA5-FRT-TO-Flag-BIRA*     | CEP128-Flag-BIRA*               | <p>FOR (HindIII site):<br/>5'-TCAGAAGCTTAGCATGGCCGAGAGCAGCAGC-3'</p> <p>REV (KpnI site):<br/>5'-CTGAGGTACCCGCTGCCGTATTCCTCTTTC-3'</p>                                                                                                                    |
|               | CMV promoter-pDEST-TO-GFP-FRT             | GFP-CEP128                      | Gift from Pelletier Lab                                                                                                                                                                                                                                  |

884  
885  
886  
887  
888  
889  
890  
891  
892

**Table S7:** List of antibodies used in this study

Note: CTD-recognizing antibodies were used at default in case of multiple antibodies for the same protein, unless mentioned otherwise.

| Gene          | Domain recognized                | Source        | Catalog # | Species | Dilution | Fixation method |
|---------------|----------------------------------|---------------|-----------|---------|----------|-----------------|
| <i>CEP128</i> | CTD (aa 1044-1094)               | Abcam         | Ab11879   | rabbit  | 1:50     | methanol        |
| <i>ODF2</i>   | CTD (aa 750-C-terminus)          | Abcam         | Ab43840   | rabbit  | 1:500    | methanol        |
|               | NTD<br>aa 250-632<br>(hCenexin1) | Kyung Lee Lab | -         | rabbit  | 1:50     | methanol        |

|                |                                           |                        |                |        |          |                 |
|----------------|-------------------------------------------|------------------------|----------------|--------|----------|-----------------|
|                | aa 255–618<br>(hOdf2)                     |                        |                |        |          |                 |
| <i>CEP19</i>   | aa 1-163                                  | Proteintech            | 26036-1-AP     | rabbit | 1:50     | methanol        |
| <i>CNTRL</i>   | CTD (aa 2026-2325) (for STORM experiment) | Santa Cruz             | sc-135020      | rabbit | 1:50     | methanol        |
|                | CTD (aa 2187-2291)                        | Atlas Antibodies       | HPA020468      | rabbit | 1:50     | methanol or PFA |
|                | CTD (aa 2026-2325)                        | Santa Cruz             | sc365521       | mouse  | 1:50     | methanol        |
|                | MD (aa 1063-1168)                         | Atlas Antibodies       | HPA051583      | rabbit | 1:25     | methanol        |
| <i>NIN</i>     | CTD (aa 1870-2020)                        | Proteintech            | 13007-1-AP     | rabbit | 1:500    | methanol        |
|                | NTD (L77)                                 | Michael Bornens Lab    | -              | rabbit | 1:10,000 | methanol        |
|                | NTD (in SDA measurements)                 | Santa Cruz             | sc-5014 (Y-16) | goat   | 1:50     | methanol        |
| <i>CEP170</i>  | CTD (aa 1534-C-terminus)                  | Abcam                  | Ab7250         | rabbit | 1:200    | methanol        |
|                | MD (aa 1010-1200)                         | Iain Cheeseman Lab     | -              | rabbit | 1:1000   | methanol        |
|                | NTD                                       | Thermo Fisher          | 41-3200        | mouse  | 1:200    | methanol        |
| <i>CCDC120</i> | aa 150-250                                | Atlas Antibodies       | HPA000561      | rabbit | 1:50     | methanol        |
| <i>CCDC68</i>  | aa 165-247                                | Atlas Antibodies       | HPA048197      | rabbit | 1:50     | methanol        |
| <i>GAL3</i>    | -                                         | Elsasser Lab           | -              | rabbit | 1:100    | methanol        |
| <i>CC2D2A</i>  | -                                         | Proteintech            | 22293-1-AP     | rabbit | 1:50     | methanol        |
| <i>CEP112</i>  | CTD (aa 607-955)                          | Proteintech            | 24928-1-AP     | rabbit | 1:100    | methanol        |
|                | MD (aa361-427)                            | Atlas antibodies       | HPA024481      | rabbit | 1:50     | methanol or PFA |
| <i>POC1B</i>   | aa 321-350                                | Invitrogen             | PA5-24495      | rabbit | 1:50     | methanol        |
|                | -                                         | Tomer Avidor-Reiss Lab | -              | rat    | 1:50     | methanol        |

|                                                              |             |                   |                         |         |         |                 |
|--------------------------------------------------------------|-------------|-------------------|-------------------------|---------|---------|-----------------|
| <i>Polyglutamylation Modification</i>                        | -           | Adipogen          | AG-20B-0020-C1 (GT335)  | mouse   | 1:1000  | methanol        |
| <i>TUBA4A (<math>\alpha</math>-tubulin)</i>                  | -           | Sigma-Aldrich     | T9026 (DM1A)            | mouse   | 1:500   | methanol or PFA |
| <i>TUBA4A (<math>\alpha</math>-tubulin- FITC conjugated)</i> | -           | Sigma-Aldrich     | F2168 (DM1A)            | mouse   | 1:500   | methanol or PFA |
| <i>SAS6</i>                                                  | -           | Santa Cruz        | sc-82360                | mouse   | 1:200   | methanol        |
| <i>TCHP</i>                                                  | aa 261-335  | Atlas Antibodies  | HPA038638               | rabbit  | 1:50    | methanol        |
| <i>GFP</i>                                                   | full-length | Abcam             | Ab13970                 | chicken | 1:2000  | methanol        |
| <i>Turbo GFP</i>                                             | full-length | Thermo Fisher     | PA5-22688               | rabbit  | 1:500   | PFA             |
| <i>NEDD1</i>                                                 |             | Abcam             | 57336                   | mouse   | 1:500   | methanol        |
| <i><math>\gamma</math>-tubulin</i>                           |             | Sigma             | T6557                   | mouse   | 1:500   | methanol        |
| <i>RPGRIPL</i>                                               |             | Proteintech       | 55160-1-AP              | rabbit  | 1:50    | methanol        |
| <i>RSPH4A</i>                                                |             | Atlas Antibodies  | HPA031196               | rabbit  | 1:50    | methanol        |
| <i>GAS8</i>                                                  |             | Atlas Antibodies  | HPA041311               | rabbit  | 1:50    | methanol        |
| <i>CEP120</i>                                                |             | Moe Mahjoub Lab   | Mahjoub et al. JCB 2010 | rabbit  | 1:10000 | methanol        |
| <i>CEP164</i>                                                | -           | Novus Biologicals | 45330002                | rabbit  | 1:500   | methanol        |
| <i>acetylated <math>\alpha</math>-tubulin</i>                |             | Sigma             | T7451                   | mouse   | 1:50    | methanol        |
| <i>ZO-1</i>                                                  |             | Santa Cruz        | sc-33725                | rat     | 1:1000  | methanol        |
| <i>phospho-TGFbeta RI (S165)</i>                             | aa 131-180  | Abcam             | ab112095                | rabbit  | 1:50    | PFA             |
